# Supplementary material for: Novel chemoselective tosylation of the alcoholic hydroxyl group of syn-α,β-disubstituted β-hydroxy carboxylic acids
Source: Royal Society of Chemistry journal article supplement (doi:10.1039/b416383d), 2005-01-01

(Electronic Supplementary Information)

**Novel Chemoselective Tosylation of the Alcoholic Hydroxyl Group of  
Syn- $\alpha,\beta$ -Disubstituted  $\beta$ -Hydroxy Carboxylic Acids.**

*Yikang Wu\* and Ya-Ping Sun*

State Key Laboratory of Bio-organic and Natural Products Chemistry,  
Shanghai Institute of Organic Chemistry, Chinese Academy of Sciences,  
354 Fenglin Road, Shanghai 200032, China  
E-mail address: yikangwu@mail.sioc.ac.cn

**Table of Contents of ESI**

|                                              |      |
|----------------------------------------------|------|
| General Information .....                    | S 2  |
| Listing of physical/spectroscopic data ..... | S 2  |
| <sup>1</sup> H NMR of <b>1a</b> .....        | S 10 |
| <sup>1</sup> H NMR of <b>2a</b> .....        | S 11 |
| <sup>1</sup> H NMR of <b>1b</b> .....        | S 12 |
| <sup>1</sup> H NMR of <b>2b</b> .....        | S 13 |
| <sup>1</sup> H NMR of <b>2c</b> .....        | S 14 |
| <sup>1</sup> H NMR of <b>1d</b> .....        | S 15 |
| <sup>1</sup> H NMR of <b>2d</b> .....        | S 16 |
| <sup>1</sup> H NMR of <b>1e</b> .....        | S 17 |
| <sup>1</sup> H NMR of <b>2e</b> .....        | S 18 |
| <sup>1</sup> H NMR of <b>1f</b> .....        | S 19 |
| <sup>1</sup> H NMR of <b>2f</b> .....        | S 20 |
| <sup>1</sup> H NMR of <b>1g</b> .....        | S 21 |
| <sup>1</sup> H NMR of <b>2g</b> .....        | S 22 |
| <sup>1</sup> H NMR of <b>1i</b> .....        | S 23 |
| <sup>1</sup> H NMR of <b>1j</b> .....        | S 24 |
| <sup>1</sup> H NMR of <b>1k</b> .....        | S 25 |
| <sup>1</sup> H NMR of <b>2k</b> .....        | S 26 |
| <sup>1</sup> H NMR of <b>1l</b> .....        | S 27 |
| <sup>1</sup> H NMR of <b>2l</b> .....        | S 28 |
| <sup>1</sup> H NMR of <b>1m</b> .....        | S 29 |
| <sup>1</sup> H NMR of <b>2m</b> .....        | S 30 |
| <sup>1</sup> H NMR of <b>3</b> .....         | S 31 |
| <sup>1</sup> H NMR of <b>4</b> .....         | S 32 |
| <sup>1</sup> H NMR of <b>5</b> .....         | S 33 |

**General information**<sup>1</sup>. The starting  $\beta$ -hydroxy acids were prepared by treating corresponding Crimmins *syn*-aldols (prepared from appropriate *N*-acylthiazolidinethiones and aldehydes by  $\text{TiCl}_4$ -mediated asymmetric aldolization under the conditions reported<sup>2</sup> by Crimmins and co-workers) with  $\text{LiOH}/\text{H}_2\text{O}_2$  following the standard procedure<sup>3</sup> of Evans in good to excellent yields. The THF used in the reaction was freshly distilled over Na/benzophenone under argon. The MeLi was purchased from Acros (solution in diethyl ether, containing LiBr). The  $^1\text{H}$  NMR spectra were recorded at 300 MHz in  $\text{CDCl}_3$  with  $\text{SiMe}_4$  as the internal reference.

## References

- 1 For compound **1c** and **1h**, see (a) Y. Wu, Y.-P. Sun, Y.-Q. Yang, Q. Hu, Q.; Zhang, *J. Org. Chem.* 2004, **69**, 6141-6144, and (b) L. M. Dollinger, A. R. Howell, *J. Org. Chem.* 1996, **61**, 7248-7249, respectively.
- 2 See, e.g.: (a) M. T. Crimmins, B. W. King, E. A. Tabet, K. Chaudhary, *K. J. Org. Chem.* **2001**, *66*, 894-902. (b) M. T. Crimmins, K. Chaudhary, *Org. Lett.* **2000**, *2*, 775-778.
- 3 D. A. Evans, T. C. Britton, J. A. Ellman, *Tetrahedron Lett.* **1987**, *28*, 6141-6144.

## The physical and spectroscopic data for all the new compounds

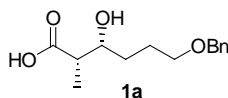

**Compound 1a**: A colorless oil.  $[\alpha]_{\text{D}}^{27} +17.7$  (*c* 3.1,  $\text{CHCl}_3$ ).  $^1\text{H}$  NMR  $\delta$  7.38-7.26 (m, 5H), 4.53 (s, 2H), 3.89 (dt,  $J = 9.7, 3.3$  Hz, 1H), 3.61-3.47 (m, 2H), 2.63 (dq,  $J = 3.9, 7.2$  Hz, 1H), 1.82-1.63 (m, 3H), 1.55-1.43 (m, 1H), 1.19 (d,  $J = 7.1$  Hz, 3H); FT-IR (film) 3700-2700 (lump, centered around 3405), 1651, 1020, 703  $\text{cm}^{-1}$ ; ESI-MS  $m/z$  253.05 ( $[\text{M}+\text{H}]^+$ ). ESI-HRMS: Calcd for  $\text{C}_{14}\text{H}_{20}\text{O}_4\text{Na}$  ( $[\text{M}+\text{Na}]^+$ ): 275.1254. Found: 275.1265.

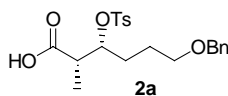

**Compound 2a**: A colorless oil.  $[\alpha]_{\text{D}}^{26} +23.0$  (*c* 0.6,  $\text{CHCl}_3$ ).  $^1\text{H}$  NMR  $\delta$  7.77 (d,  $J = 8.5$  Hz, 2H), 7.37-7.26 (m, 7H), 4.90 (q,  $J = 5.8$  Hz, 2H), 3.41 and 3.42 (two triplets,  $J = 6.1$  Hz, 2H altogether), 2.76 (dq,  $J = 4.8, 7.3$  Hz, 1H), 2.41 (s, 3H), 1.85-1.77 (m, 2H), 1.65-1.54 (m, 2H), 1.16 (d,  $J = 7.3$  Hz, 3H); FT-IR (film) 3600-2200 (lump), 1712, 1599, 1498, 1455, 1363, 1189, 1098, 925  $\text{cm}^{-1}$ ; ESI-MS  $m/z$  424.1 ( $[\text{M}+\text{NH}_4]^+$ ). ESI-HRMS: Calcd for  $\text{C}_{21}\text{H}_{26}\text{O}_6\text{SNa}$  ( $[\text{M}+\text{Na}]^+$ ): 429.1342. Found: 429.1359.

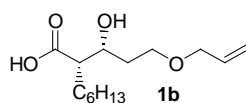

**Compound 1b:** A colorless oil.  $[\alpha]_D^{27} +14.3$  (*c* 3.1,  $\text{CHCl}_3$ ).  $^1\text{H NMR } \delta$  5.89 (ddt,  $J = 10.5, 17.3, 5.6$  Hz, 1H), 5.27 (br d,  $J = 17.4$  Hz, 2H), 5.21 (br d,  $J = 10.2$  Hz, 1H), 4.07-3.97 (m, 3H), 3.74 (dt,  $J = 4.9, 7.2$  Hz, 1H), 3.64 (dt,  $J = 4.0, 9.0$  Hz, 1H), 2.53 (dt,  $J = 5.2, 9.1$  Hz, 1H), 1.90-1.28 (m, 10H), 0.88 (t,  $J = 6.7$  Hz, 3H); FT-IR (film) 3600-2300 (lump), 3360, 1709, 1459, 1205, 1118, 991, 927  $\text{cm}^{-1}$ ; ESI-MS  $m/z$  281.2 ( $[\text{M}+\text{Na}]^+$ ), 259.2 ( $[\text{M}+\text{H}]^+$ ). ESI-HRMS: Calcd for  $\text{C}_{14}\text{H}_{26}\text{O}_4\text{Na}$  ( $[\text{M}+\text{Na}]^+$ ): 281.1723. Found: 281.1729.

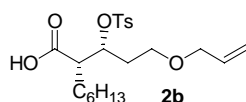

**Compound 2b:** A colorless oil.  $[\alpha]_D^{26} +16.2$  (*c* 0.8,  $\text{CHCl}_3$ ).  $^1\text{H NMR } \delta$  7.81 (d,  $J = 8.0$  Hz, 2H), 7.34 (d,  $J = 8.1$  Hz, 2H), 5.85 (ddt,  $J = 10.6, 17.5, 5.1$  Hz 1H), 5.23 (br d,  $J = 17.2$  Hz, 1H), 5.17 (br d,  $J = 10.1$  Hz, 1H), 4.88 (q,  $J = 5.8$  Hz, 1H), 3.84 (d,  $J = 5.5$  Hz, 1H), 3.51-3.44 (m, 1H), 3.36-3.26 (m, 1H), 2.79 (dt,  $J = 5.0, 7.7$  Hz, 1H), 2.44 (s, 3H), 1.99 (q,  $J = 5.8$  Hz, 2H), 1.55-1.11 (m, 10H), 0.87 (t,  $J = 6.8$  Hz, 3H); FT-IR (film) 3600-2300 (lump), 1712, 1599, 1456, 1369, 1177, 1097, 920  $\text{cm}^{-1}$ ; ESI-MS  $m/z$  435.20 ( $[\text{M}+\text{Na}]^+$ ). ESI-HRMS: Calcd for  $\text{C}_{21}\text{H}_{32}\text{O}_6\text{SNa}$  ( $[\text{M}+\text{Na}]^+$ ): 435.1812. Found: 435.1818.

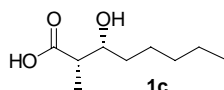

**Compound 1c:** A colorless oil:  $[\alpha]_D^{23} +8.13$  (*c* 0.55,  $\text{CHCl}_3$ ).  $^1\text{H NMR } \delta$  6.20-5.40 (very br lump, 1H), 3.97 (m, 1H), 2.61 (dq,  $J = 7.1, 3.2$  Hz, 1H), 1.49-1.31 (m, 8H), 1.20 (d,  $J = 7.1$  Hz, 3H), 0.89 (t,  $J = 6.4$  Hz, 3H). FT-IR (film) 3445, 1736, 1460, 1379, 1181  $\text{cm}^{-1}$ . ESI-MS  $m/z$ : 197.1 ( $[\text{M}+\text{Na}]^+$ ), 192.1 ( $[\text{M}+\text{NH}_4]^+$ ). EI-HRMS calcd for  $\text{C}_9\text{H}_{18}\text{O}_3$  ( $\text{M}^+$ ) 174.1256; found 174.1243.

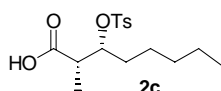

**Compound 2c:** A colorless oil.  $[\alpha]_D^{25} +10.9$  (*c* 0.65,  $\text{CHCl}_3$ ).  $^1\text{H NMR } \delta$  7.80 (d,  $J = 8.1$  Hz, 2H), 7.32 (d,  $J$

= 8.1 Hz, 2H), 4.85 (dt,  $J = 10.2, 3.9$  Hz 1H), 2.75 (dq,  $J = 7.1, 6.4$  Hz, 1H), 2.45 (s, 3H), 1.76-1.70 (m, 1H), 1.64-1.56 (m, 1H), 1.33-1.16 (m, 9H), 0.83 (t,  $J = 6.6$  Hz, 3H); FT-IR (film) 3600-2300 (lump), 1717, 1601, 1497, 1364, 1188, 1096, 908  $\text{cm}^{-1}$ ; ESI-MS  $m/z$  346.2 ( $[\text{M}+\text{NH}_4]^+$ ). ESI-HRMS: Calcd for  $\text{C}_{16}\text{H}_{24}\text{O}_5\text{SNa}$  ( $[\text{M}+\text{Na}]^+$ ): 351.1237. Found: 351.1237.

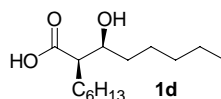

**Compound 1d:** A colorless oil.  $[\alpha]_{\text{D}}^{27} -10.4$  ( $c$  2.7,  $\text{CHCl}_3$ ).  $^1\text{H NMR}$   $\delta$  3.88-3.85 (m, 1H), 2.48 (dt,  $J = 10.0, 4.3$  Hz, 1H), 1.73-1.24 (m, 15H), 0.88 (t,  $J = 6.4$  Hz, 3H), 0.86 (t,  $J = 6.4$  Hz, 3H); FT-IR (film) 3700-2700 (lump), 3254, 1704, 1456, 1219, 701  $\text{cm}^{-1}$ ; ESI-MS  $m/z$  262.4 ( $[\text{M}+\text{NH}_4]^+$ ). ESI-HRMS: Calcd for  $\text{C}_{14}\text{H}_{28}\text{O}_3\text{Na}$  ( $[\text{M}+\text{Na}]^+$ ): 267.1931. Found: 267.1940.

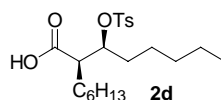

**Compound 2d:** A colorless oil.  $[\alpha]_{\text{D}}^{25} -3.5$  ( $c$  0.4,  $\text{CHCl}_3$ ).  $^1\text{H NMR}$   $\delta$  7.80 (d,  $J = 8.1$  Hz, 2H), 7.34 (d,  $J = 8.1$  Hz, 2H), 4.72 (dt,  $J = 4.5, 6.6$  Hz, 1H), 2.69 (ddd,  $J = 4.1, 6.3, 10.1$  Hz, 1H), 2.44 (s, 3H), 1.63-1.39 (m, 3H), 1.29-1.16 (m, 15H), 0.87 (t,  $J = 6.9$  Hz, 3H), 0.82 (t,  $J = 7.4$  Hz, 3H); FT-IR (film) 3500-2400 (lump), 1710, 1599, 1460, 1364, 1188, 1072, 913  $\text{cm}^{-1}$ ; ESI-MS  $m/z$  416.4 ( $[\text{M}+\text{NH}_4]^+$ ). ESI-HRMS: Calcd for  $\text{C}_{21}\text{H}_{34}\text{O}_5\text{SNa}$  ( $[\text{M}+\text{Na}]^+$ ): 421.2019. Found: 421.2015.

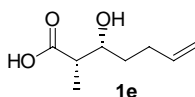

**Compound 1e:** A colorless oil.  $[\alpha]_{\text{D}}^{26} +7.4$  ( $c$  1.05,  $\text{CHCl}_3$ ).  $^1\text{H NMR}$   $\delta$  5.84 (ddt,  $J = 10.2, 16.9, 6.8$  Hz, 1H), 5.07 (br d,  $J = 17.2$  Hz, 1H), 5.00 (br d,  $J = 10.2$  Hz, 1H), 3.96 (dt,  $J = 9.1, 3.8$  Hz, 1H), 2.61 (dq,  $J = 3.6, 7.2$  Hz, 1H), 2.33-2.10 (m, 2H), 1.69-1.47 (m, 2H), 1.22 (d,  $J = 7.6$  Hz, 3H); FT-IR (film) 3600-2700 (lump), 3393, 1712, 1642, 1460, 1207, 916  $\text{cm}^{-1}$ ; ESI-MS  $m/z$  181.2 ( $[\text{M}+\text{Na}]^+$ ), 176.2 ( $[\text{M}+\text{NH}_4]^+$ ). MALDI-HRMS: Calcd for  $\text{C}_8\text{H}_{14}\text{O}_3\text{Na}$  ( $[\text{M}+\text{Na}]^+$ ): 181.0835. Found: 181.0846.

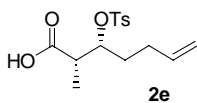

**Compound 2e:** A colorless oil.  $[\alpha]_D^{25} +8.2$  (*c* 0.95,  $\text{CHCl}_3$ ).  $^1\text{H NMR}$   $\delta$  7.80 (d,  $J = 8.3$  Hz, 2H), 7.33 (d,  $J = 7.7$  Hz, 2H), 5.70 (ddt,  $J = 9.9, 17.8, 6.3$  Hz, 1H), 5.03 (br d,  $J = 17.1$  Hz, 1H), 4.97 (br d,  $J = 11.8$  Hz, 1H), 4.88 (dt,  $J = 7.2, 5.1$  Hz, 1H), 2.76 (dq,  $J = 5.2, 6.9$  Hz, 1H), 2.45 (s, 3H), 2.08-1.72 (m, 4H), 1.17 (d,  $J = 6.9$  Hz, 3H); FT-IR (film) 3700-2300 (lump), 1713, 1645, 1598, 1456, 1363, 1177, 1077, 918  $\text{cm}^{-1}$ ; ESI-MS  $m/z$  330.1 ( $[\text{M}+\text{NH}_4]^+$ ). ESI-HRMS: Calcd for  $\text{C}_{15}\text{H}_{20}\text{O}_5\text{SNa}$  ( $[\text{M}+\text{Na}]^+$ ): 335.0924. Found: 335.0937.

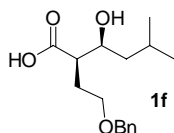

**Compound 1f:** A colorless oil.  $[\alpha]_D^{27} -7.0$  (*c* 3.34,  $\text{CHCl}_3$ ).  $^1\text{H NMR}$   $\delta$  7.38-7.26 (m, 5H), 4.25 (s, 2H), 4.03-3.98 (m, 1H), 3.63-3.56 (m, 2H), 2.64 (dt,  $J = 8.0, 4.0$  Hz, 1H), 2.12-2.00 (m, 1H), 1.95-1.88 (m, 1H), 1.84-1.76 (m, 1H), 1.49 (ddd,  $J = 4.2, 9.9, 13.9$  Hz, 1H), 1.26-1.15 (m, 1H), 0.92 (d,  $J = 7.0$  Hz, 3H), 0.90 (d,  $J = 6.7$  Hz, 3H); FT-IR (film) 3700-2300 (lump), 3419, 1707, 1499, 1455, 1367, 1177, 1079, 738, 698  $\text{cm}^{-1}$ ; ESI-MS  $m/z$  303.1 ( $[\text{M}+\text{Na}]^+$ ), 281.2 ( $[\text{M}+\text{H}]^+$ ), 176.2 ( $[\text{M}+\text{NH}_4]^+$ ). ESI-HRMS: Calcd for  $\text{C}_{16}\text{H}_{24}\text{O}_4\text{Na}$  ( $[\text{M}+\text{Na}]^+$ ): 303.1567. Found: 303.1554.

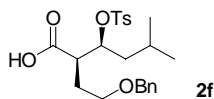

**Compound 2f:** A colorless oil.  $[\alpha]_D^{27} -12.0$  (*c* 0.6,  $\text{CHCl}_3$ ).  $^1\text{H NMR}$   $\delta$  7.83 (d,  $J = 8.1$  Hz, 2H), 7.36-7.27 (m, 7H), 4.96 (dt,  $J = 8.7, 4.2$  Hz, 1H), 4.46 (s, 2H), 3.55-3.46 (m, 2H), 2.92 (dt,  $J = 9.6, 4.5$  Hz, 1H), 2.41 (s, 3H), 1.98-1.93 (m, 1H), 1.83-1.57 (m, 3H), 1.44-1.38 (m, 1H), 0.87 (d,  $J = 7.2$  Hz, 3H), 0.79 (d,  $J = 7.5$  Hz, 3H); FT-IR (film) 3600-2300 (lump), 1712, 1599, 1499, 1454, 1360, 1176, 1097, 925, 888  $\text{cm}^{-1}$ ; ESI-MS  $m/z$  452.1 ( $[\text{M}+\text{NH}_4]^+$ ), 435.1 ( $[\text{M}+\text{H}]^+$ ). ESI-HRMS: Calcd for  $\text{C}_{23}\text{H}_{30}\text{O}_6\text{SNa}$  ( $[\text{M}+\text{Na}]^+$ ): 457.1655. Found: 457.1668.

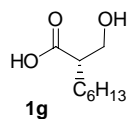

**Compound 1g:** A colorless oil.  $[\alpha]_D^{27} +3.0$  (*c* 2.28, CHCl<sub>3</sub>). <sup>1</sup>H NMR  $\delta$  6.80-6.20 (lump, 2H), 3.79 (d, *J* = 6.2 Hz, 2H), 2.62 (br quint, *J* = 6.2 Hz, 1H), 1.86-60 (m, 1H), 1.60-1.44 (m, 1H), 1.44-1.20 (m, 8H), 0.88 (t, *J* = 6.6 Hz, 3H); FT-IR (film) 3700-2300 (lump), 3369, 1710, 1467, 1199, 1032 cm<sup>-1</sup>; ESI-MS *m/z* 192.3 ([M+NH<sub>4</sub>)<sup>+</sup>). MALDI-HRMS: Calcd for C<sub>9</sub>H<sub>18</sub>O<sub>3</sub>Na ([M+Na]<sup>+</sup>): 197.1148. Found: 197.1160.

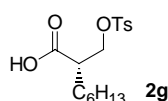

**Compound 2g:** A colorless oil.  $[\alpha]_D^{26} +3.2$  (*c* 1.0, CHCl<sub>3</sub>). <sup>1</sup>H NMR  $\delta$  7.79 (d, *J* = 8.3 Hz, 2H), 7.35 (d, *J* = 8.4 Hz, 7H), 4.17 (dd, *J* = 9.6, 7.8 Hz, 1 H), 2.74 (quint, *J* = 6.7 Hz, 1H), 2.46 (s, 3H), 1.60-1.47 (m, 2H), 1.28-1.24 (m, 8H), 0.87 (t, *J* = 6.9 Hz, 3H); FT-IR (film) 3700-2300 (lump), 1713, 1599, 1498, 1463, 1366, 1177, 1097, 974, 815 cm<sup>-1</sup>; ESI-MS *m/z* 346.2 ([M+NH<sub>4</sub>)<sup>+</sup>), 435.1 ([M+H]<sup>+</sup>). ESI-HRMS: Calcd for C<sub>16</sub>H<sub>24</sub>O<sub>5</sub>SNa ([M+Na]<sup>+</sup>): 351.1237. Found: 351.1246.

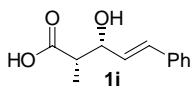

**Compound 1i:** A colorless oil.  $[\alpha]_D^{27} +2.8$  (*c* 0.2, CHCl<sub>3</sub>). <sup>1</sup>H NMR  $\delta$  7.41-7.25 (m, 5H), 6.68 (d, *J* = 15.7 Hz, 1H), 6.21 (dd, *J* = 6.0, 16.0 Hz, 1H), 5.8-4.8 (lump, 2H, 2OH's), 4.66-4.63 (m, 1H), 2.81 (dq, *J* = 3.9, 7.3 Hz, 2H), 1.26 (d, *J* = 7.1 Hz, 3H); FT-IR (film) 3700-2300 (lump), 3400, 1705, 1498, 1207, 967 cm<sup>-1</sup>; ESI-MS *m/z* 229.1 ([M+Na]<sup>+</sup>). MALDI-HRMS: Calcd for C<sub>12</sub>H<sub>14</sub>O<sub>3</sub>Na ([M+Na]<sup>+</sup>): 229.0835. Found: 229.0844.

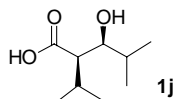

**Compound 1j:** A colorless oil.  $[\alpha]_D^{27} +7.7$  (*c* 0.55, CHCl<sub>3</sub>). <sup>1</sup>H NMR  $\delta$  3.43 (dd, *J* = 8.6, 3.5 Hz, 1H), 2.31 (dd, *J* = 3.5, 9.4 Hz, 1H), 2.21-2.09 (m, 1H) 1.69-1.58 (m, 1H), 1.10-0.92 (several doublets stemming from different conformers with an average *J* = 6.8 Hz, 12H altogether); FT-IR (film of conc. solution in CH<sub>2</sub>Cl<sub>2</sub>)

3299, 1679, 1290, 1007  $\text{cm}^{-1}$ ; ESI-MS  $m/z$  197.2 ( $[\text{M}+\text{Na}]^+$ ), 192.3 ( $[\text{M}+\text{NH}_4]^+$ ). MALDI-HRMS: Calcd for  $\text{C}_9\text{H}_{18}\text{O}_3\text{Na}$  ( $[\text{M}+\text{Na}]^+$ ): 197.1148. Found: 197.1161.

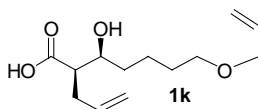

**Compound 1k:** A colorless oil.  $[\alpha]_D^{25} -7.9$  ( $c$  0.4,  $\text{CHCl}_3$ ).  $^1\text{H NMR}$   $\delta$  5.89 (ddt,  $J = 10.2, 17.3, 5.6$  Hz, 1H), 5.83 (ddt,  $J = 10.1, 17.0, 6.9$  Hz, 1H), 5.28 (br d,  $J = 17.5$  Hz, 1H), 5.19 (br d,  $J = 10.4$  Hz, 1H), 5.12 (br d,  $J = 16.9$  Hz, 1H), 5.06 (br d,  $J = 10.3$  Hz, 1H), 3.97 (br d,  $J = 5.8$  Hz, 2H), 3.90 (q,  $J = 5.3$  Hz, 1H), 3.46 (br t,  $J = 6.2$  Hz, 2H), 2.26 (dt,  $J = 4.9, 6.8$  Hz, 1H), 2.55-2.44 (m, 1H), 2.41-2.33 (m, 1H), 1.67-1.42 (m, 6H); FT-IR (film) 3600-2300 (lump), 3402, 1709, 1642, 1460, 1082, 917  $\text{cm}^{-1}$ ; ESI-MS  $m/z$  265.2 ( $[\text{M}+\text{Na}]^+$ ), 243.3 ( $[\text{M}+\text{H}]^+$ ). MALDI-HRMS: Calcd for  $\text{C}_{13}\text{H}_{22}\text{O}_4\text{Na}$  ( $[\text{M}+\text{Na}]^+$ ): 265.1410. Found: 265.1422.

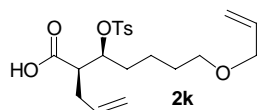

**Compound 2k:** A colorless oil.  $[\alpha]_D^{25} -10.7$  ( $c$  0.3,  $\text{CHCl}_3$ ).  $^1\text{H NMR}$   $\delta$  7.80 (d,  $J = 8.1$  Hz, 2H), 7.34 (d,  $J = 8.1$  Hz, 7H), 5.89 (ddt,  $J = 11.4, 17.4, 5.1$  Hz, 1H), 5.69 (ddt,  $J = 10.5, 17.1, 6.6$  Hz, 1H), 5.25 (br d,  $J = 17.1$  Hz, 1H), 5.20 (br d,  $J = 10$  Hz, 1H), 5.18 (br d,  $J = 17$  Hz, 1H), 5.04 (br d,  $J = 10$  Hz, 1H), 4.78 (dt,  $J = 4.5, 6.6$  Hz, 1H), 3.93 (dt,  $J = 5.7, 1.2$  Hz, 1H), 3.33 (t,  $J = 6.5$  Hz, 2H), 2.83 (dt,  $J = 9.4, 5.9$  Hz, 1H), 2.45 (s, 3H), 2.40-1.27 (m, 2H), 1.73-1.62 (m, 3H), 1.50-1.42 (m, 3H); FT-IR (film) 3600-2300 (lump), 1712, 1639, 1459, 1370, 1237, 1177, 917  $\text{cm}^{-1}$ ; ESI-MS  $m/z$  414.1 ( $[\text{M}+\text{NH}_4]^+$ ), 397.2 ( $[\text{M}+\text{H}]^+$ ). ESI-HRMS: Calcd for  $\text{C}_{20}\text{H}_{28}\text{O}_6\text{SNa}$  ( $[\text{M}+\text{Na}]^+$ ): 419.1499. Found: 419.1506.

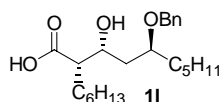

**Compound 1l:** A colorless oil.  $[\alpha]_D^{27} +11.6$  ( $c$  3.1,  $\text{CHCl}_3$ ).  $^1\text{H NMR}$   $\delta$  7.44-7.26 (m, 5H), 4.59 (d,  $J = 11.1$  Hz, 1H), 4.52 (d,  $J = 11.4$  Hz, 1H), 4.20-4.10 (m, 1H), 3.77-3.73 (m, 1H), 2.50 (dt,  $J = 4.7, 7.3$  Hz, 1H),

1.87-1.29 (m, 20H), 0.88 (t,  $J = 6.4$  Hz, 3H); FT-IR (film) 3600-2300 (lump), 3419, 1705, 1445, 1207, 734, 698  $\text{cm}^{-1}$ ; ESI-MS  $m/z$  379.2 ( $[\text{M}+\text{H}]^+$ ). ESI-HRMS: Calcd for  $\text{C}_{23}\text{H}_{38}\text{O}_4\text{Na}$  ( $[\text{M}+\text{Na}]^+$ ): 401.2662. Found: 401.2653.

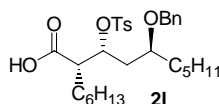

**Compound 2l:** A colorless oil.  $[\alpha]_{\text{D}}^{27} +22.4$  ( $c$  2.0,  $\text{CHCl}_3$ ).  $^1\text{H NMR}$   $\delta$  7.79 (d,  $J = 8.3$  Hz, 2H), 7.35 (d,  $J = 8.1$  Hz, 7H), 7.32-7.26 (m, 5H), 5.07 (ddd,  $J = 2.7, 4.8, 7.4$  Hz, 1H), 4.51 (d,  $J = 10.7$  Hz, 1H), 4.29 (d,  $J = 10.9$  Hz, 1H), 3.50-3.45 (m, 1H), 2.76 (dt,  $J = 4.9, 7.2$  Hz, 1H), 2.41 (s, 3H), 1.90-1.81 (m, 2H), 1.59-1.19 (m, 18H), 0.88 (t,  $J = 7.3$  Hz, 3H), 0.86 (t,  $J = 7.4$  Hz, 3H); FT-IR (film) 3600-2300 (lump), 1709, 1600, 1499, 1455, 1367, 1177, 906  $\text{cm}^{-1}$ ; ESI-MS  $m/z$  550.2 ( $[\text{M}+\text{NH}_4]^+$ ), 397.2 ( $[\text{M}+\text{H}]^+$ ). ESI-HRMS: Calcd for  $\text{C}_{30}\text{H}_{44}\text{O}_6\text{SNa}$  ( $[\text{M}+\text{Na}]^+$ ): 555.2751. Found: 555.2732.

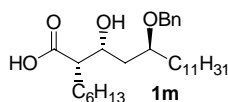

**Compound 1m:** A colorless oil.  $[\alpha]_{\text{D}}^{28} +12.3$  ( $c$  0.15,  $\text{CHCl}_3$ ).  $^1\text{H NMR}$   $\delta$  7.38-7.24 (m, 5H), 4.58 (d,  $J = 11.5$  Hz, 1H), 4.52 (d,  $J = 11.5$  Hz, 1H), 4.18-4.13 (m, 1H), 3.79-3.74 (m, 1H), 2.49 (br dt,  $J = 9.2, 4.8$  Hz, 1H), 1.86-1.02 (m, 32H), 0.88 (not fully resolved t,  $J = 5$  Hz, 3H); FT-IR (film) 3600-2400 (lump), 3448, 1707, 1458, 1206, 1069, 733, 697  $\text{cm}^{-1}$ ; ESI-MS  $m/z$  463.0 ( $[\text{M}+\text{H}]^+$ ). MALDI -HRMS: Calcd for  $\text{C}_{29}\text{H}_{50}\text{O}_4\text{Na}$  ( $[\text{M}+\text{Na}]^+$ ): 485.3601. Found: 485.3599.

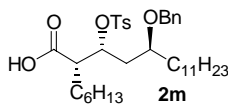

**Compound 2m:** A colorless oil.  $[\alpha]_{\text{D}}^{27} +18.9$  ( $c$  0.9,  $\text{CHCl}_3$ ).  $^1\text{H NMR}$   $\delta$  7.79 (d,  $J = 8.5$  Hz, 2H), 7.37-7.27 (m, 7H), 5.08 (ddd,  $J = 2.3, 4.6, 7.1$  Hz, 1H), 4.52 (d,  $J = 11.0$  Hz, 1H), 4.30 (d,  $J = 11.2$  Hz, 1H), 3.50-3.46 (m, 1H), 2.77 (dt,  $J = 4.7, 7.1$  Hz, 1H), 2.42 (s, 3H), 1.85-1.73 (m, 2H), 1.70-1.10 (m, 30H), 0.89 (t,  $J = 6.5$  Hz, 3H), 0.87 (t,  $J = 7.3$  Hz, 3H); FT-IR (film) 3600-2300 (lump), 1712, 1599, 1498, 1455, 1366, 1178, 1097, 996, 906, 766  $\text{cm}^{-1}$ ; ESI-MS  $m/z$  639.55 ( $[\text{M}+\text{Na}]^+$ ). ESI-HRMS: Calcd for  $\text{C}_{36}\text{H}_{56}\text{O}_6\text{SNa}$  ( $[\text{M}+\text{Na}]^+$ ):



639.3690. Found: 639.3696.

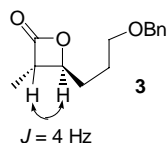

**Compound 3:** A colorless oil.  $[\alpha]_{\text{D}}^{24} -14.5$  ( $c$  0.25,  $\text{CHCl}_3$ ).  $^1\text{H NMR}$   $\delta$  7.38-7.26 (m, 5H), 4.51 (s, 2H), 4.21 (dt,  $J = 3.9, 6.5$  Hz, 1H), 3.60-3.45 (m, 2H), 3.23 (dq,  $J = 4.0, 7.5$  Hz, 1H), 1.93 (br q,  $J = 7.3$  Hz, 2H), 1.89-1.66 (m, 2H), 1.36 (d,  $J = 7.6$  Hz, 3H); FT-IR (film) 1823, 1598, 1495, 1455, 1362, 1178, 993  $\text{cm}^{-1}$ ; ESI-MS  $m/z$  235.1 ( $[\text{M}+\text{H}]^+$ ). ESI-HRMS: Calcd for  $\text{C}_{14}\text{H}_{18}\text{O}_3\text{Na}$  ( $[\text{M}+\text{Na}]^+$ ): 257.1148. Found: 257.1138.

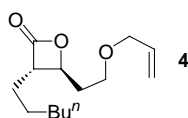

**Compound 4:** A colorless oil.  $[\alpha]_{\text{D}}^{26} -15.9$  ( $c$  0.4,  $\text{CHCl}_3$ ).  $^1\text{H NMR}$   $\delta$  5.90 (ddt,  $J = 10.6, 17.3, 5.4$  Hz, 1H), 5.28 (br d,  $J = 16.8$  Hz, 1H), 5.20 (br d,  $J = 10.9$  Hz, 1H), 4.42 (dt,  $J = 4.0, 6.5$  Hz, 1H), 3.98 (d,  $J = 5.7$  Hz, 2H), 3.62-3.51 (m, 2H), 3.31 (ddd,  $J = 4.1, 7.1, 8.4$  Hz, 1H), 2.13-2.04 (m, 2H), 1.85-1.72 (m, 2H), 1.47-1.26 (m, 8H), 0.89 (t,  $J = 6.1$  Hz, 3H); FT-IR (film) 1824, 1649, 1465, 1119  $\text{cm}^{-1}$ ; ESI-MS  $m/z$  258.2 ( $[\text{M}+\text{NH}_4]^+$ ). ESI-HRMS: Calcd for  $\text{C}_{14}\text{H}_{24}\text{O}_3\text{Na}$  ( $[\text{M}+\text{Na}]^+$ ): 263.1618. Found: 263.1611.

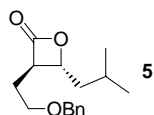

**Compound 5:** A colorless oil.  $[\alpha]_{\text{D}}^{27} +7.3$  ( $c$  0.2,  $\text{CHCl}_3$ ).  $^1\text{H NMR}$   $\delta$  4.50 (s, 2H), 4.42 (dt,  $J = 4.3, 6.3$  Hz, 1H), 3.66-3.53 (m, 2H), 3.36-3.25 (m, 1H), 2.13-2.06 (m, 2H), 1.76-1.56 (m, 3H), 0.92 (d,  $J = 6.2$  Hz, 3H), 0.89 (d,  $J = 6.6$  Hz, 3H); FT-IR (film) 1822, 1600, 1454, 1119, 893  $\text{cm}^{-1}$ ; ESI-MS  $m/z$  280.1 ( $[\text{M}+\text{NH}_4]^+$ ). ESI-HRMS: Calcd for  $\text{C}_{16}\text{H}_{22}\text{O}_3\text{Na}$  ( $[\text{M}+\text{Na}]^+$ ): 285.1461. Found: 285.1465.

S 10

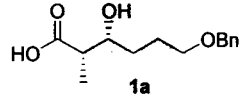

2216.9  
2215.0  
2213.4  
2208.8  
2206.2  
2201.2  
2198.5  
2193.5  
2192.1  
2189.9  
2184.9  
2182.5  
2180.4  
2178.1

1174.6  
1360.8  
1171.1  
1167.8  
1164.6  
1161.4  
1158.3  
1082.3  
1077.0  
1072.6  
1067.8  
1062.3  
1056.4  
1053.2  
1050.4  
1047.2  
1041.2  
802.0  
798.1  
795.1  
791.2  
787.5  
784.0  
780.5  
776.6  
546.9  
540.1  
534.5  
528.3  
522.6  
517.8  
515.4  
512.4  
507.4  
504.5  
500.8  
498.6  
496.0  
493.4  
490.9  
486.3  
486.3  
459.8  
456.5  
452.9  
450.6  
446.2  
443.4  
439.4  
438.5  
376.8  
376.8  
366.2  
358.3  
352.2  
-1.0

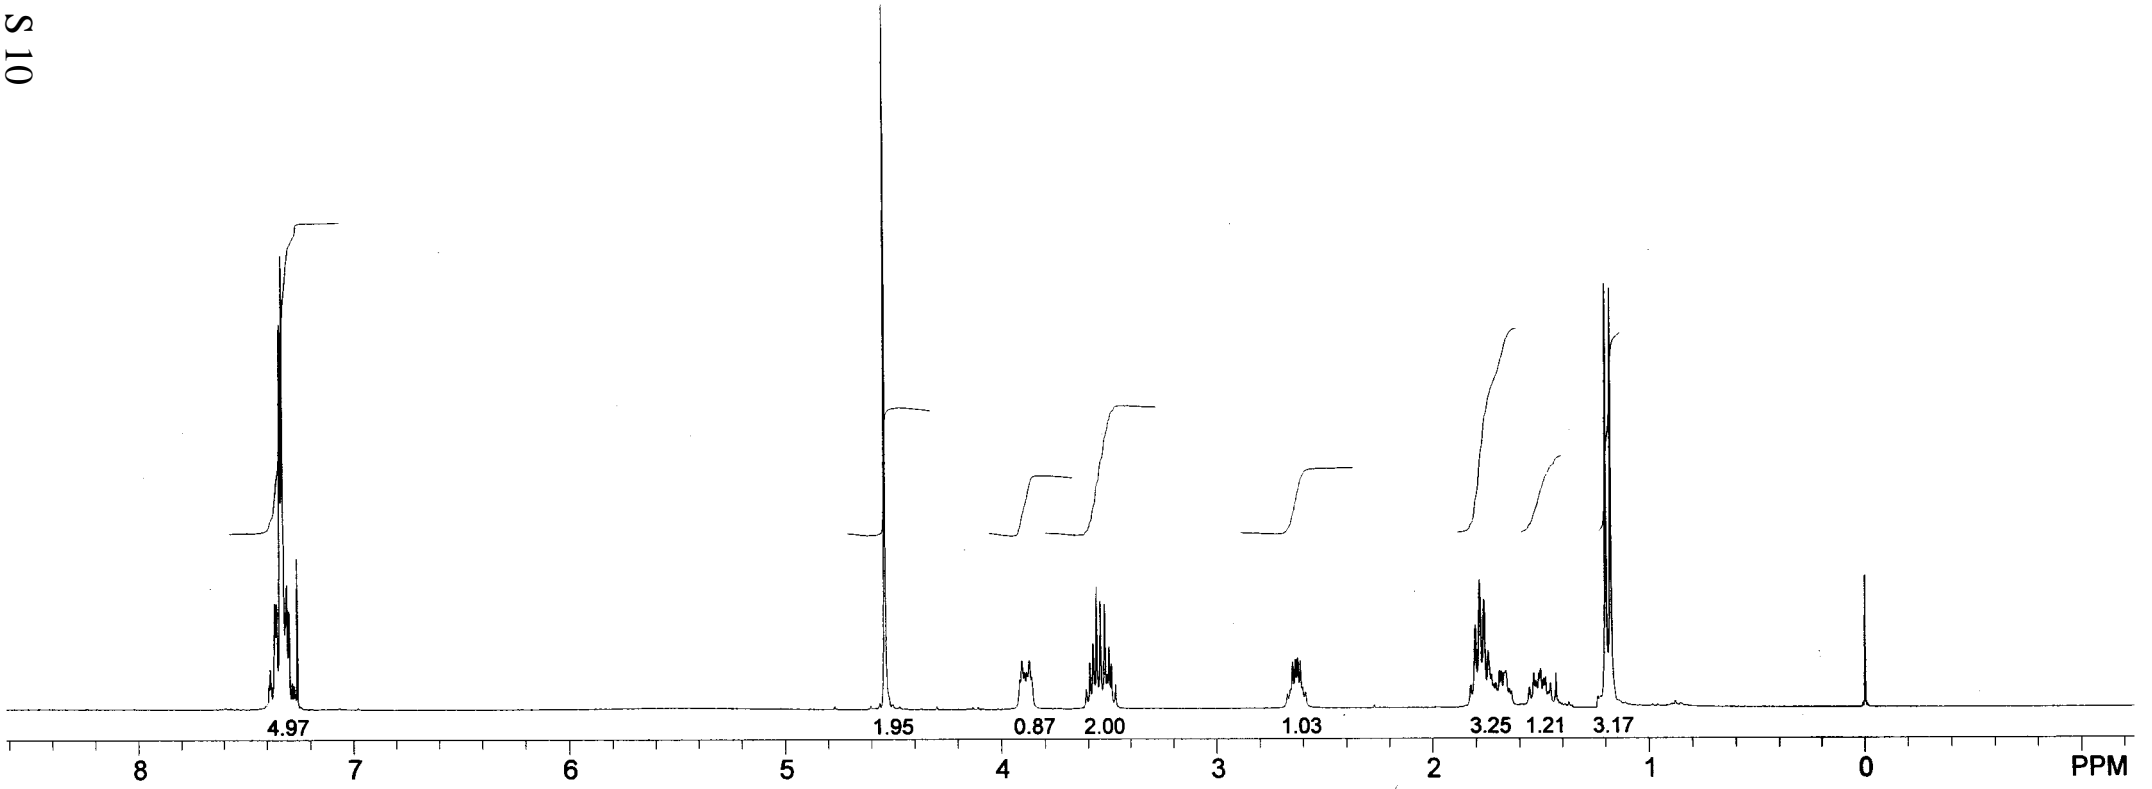

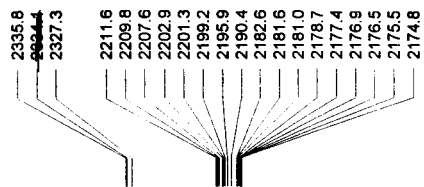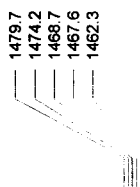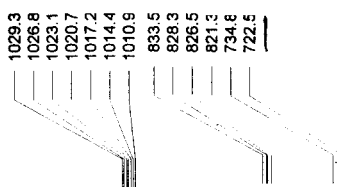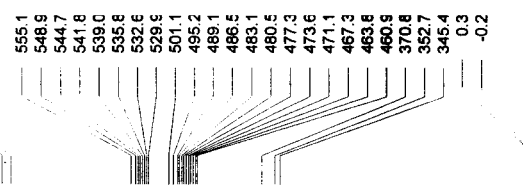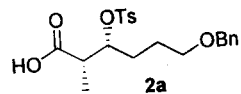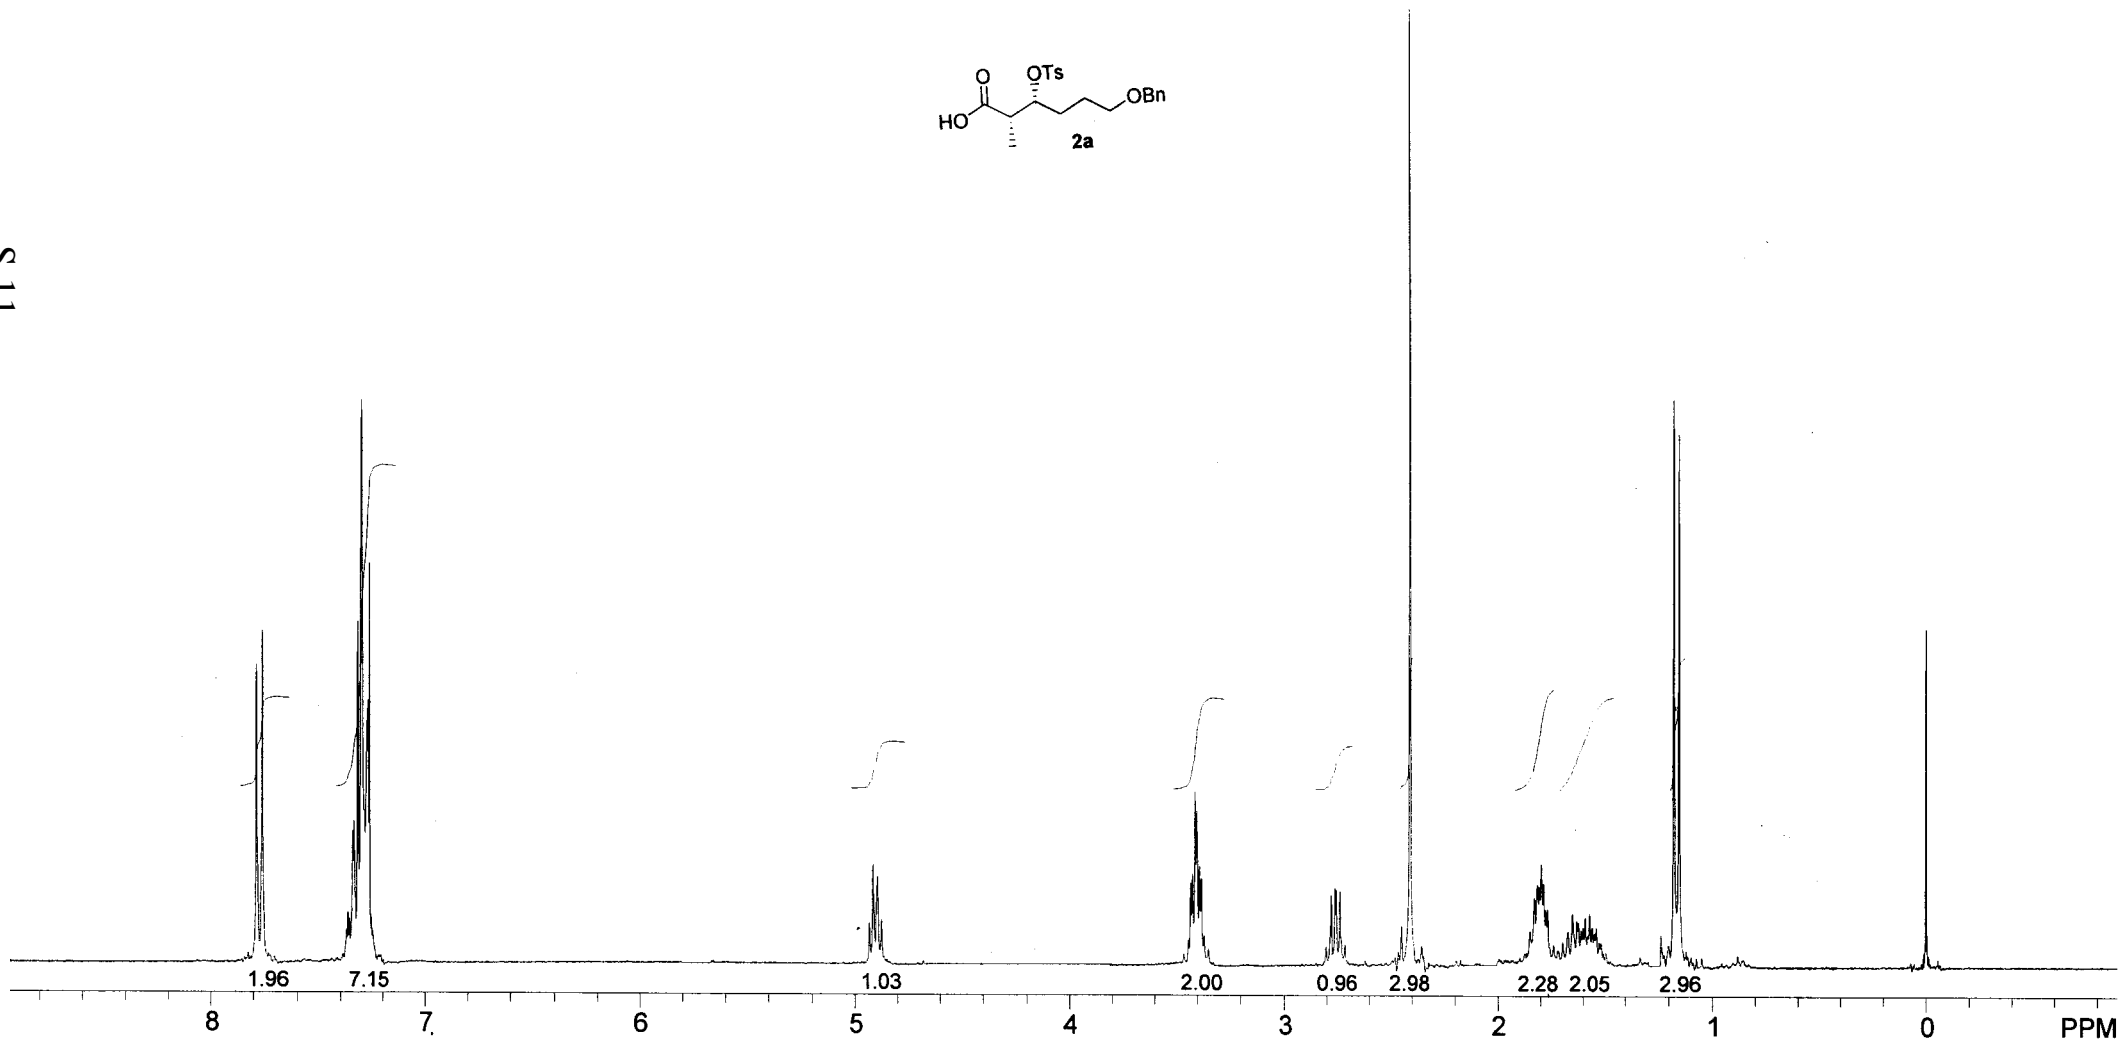

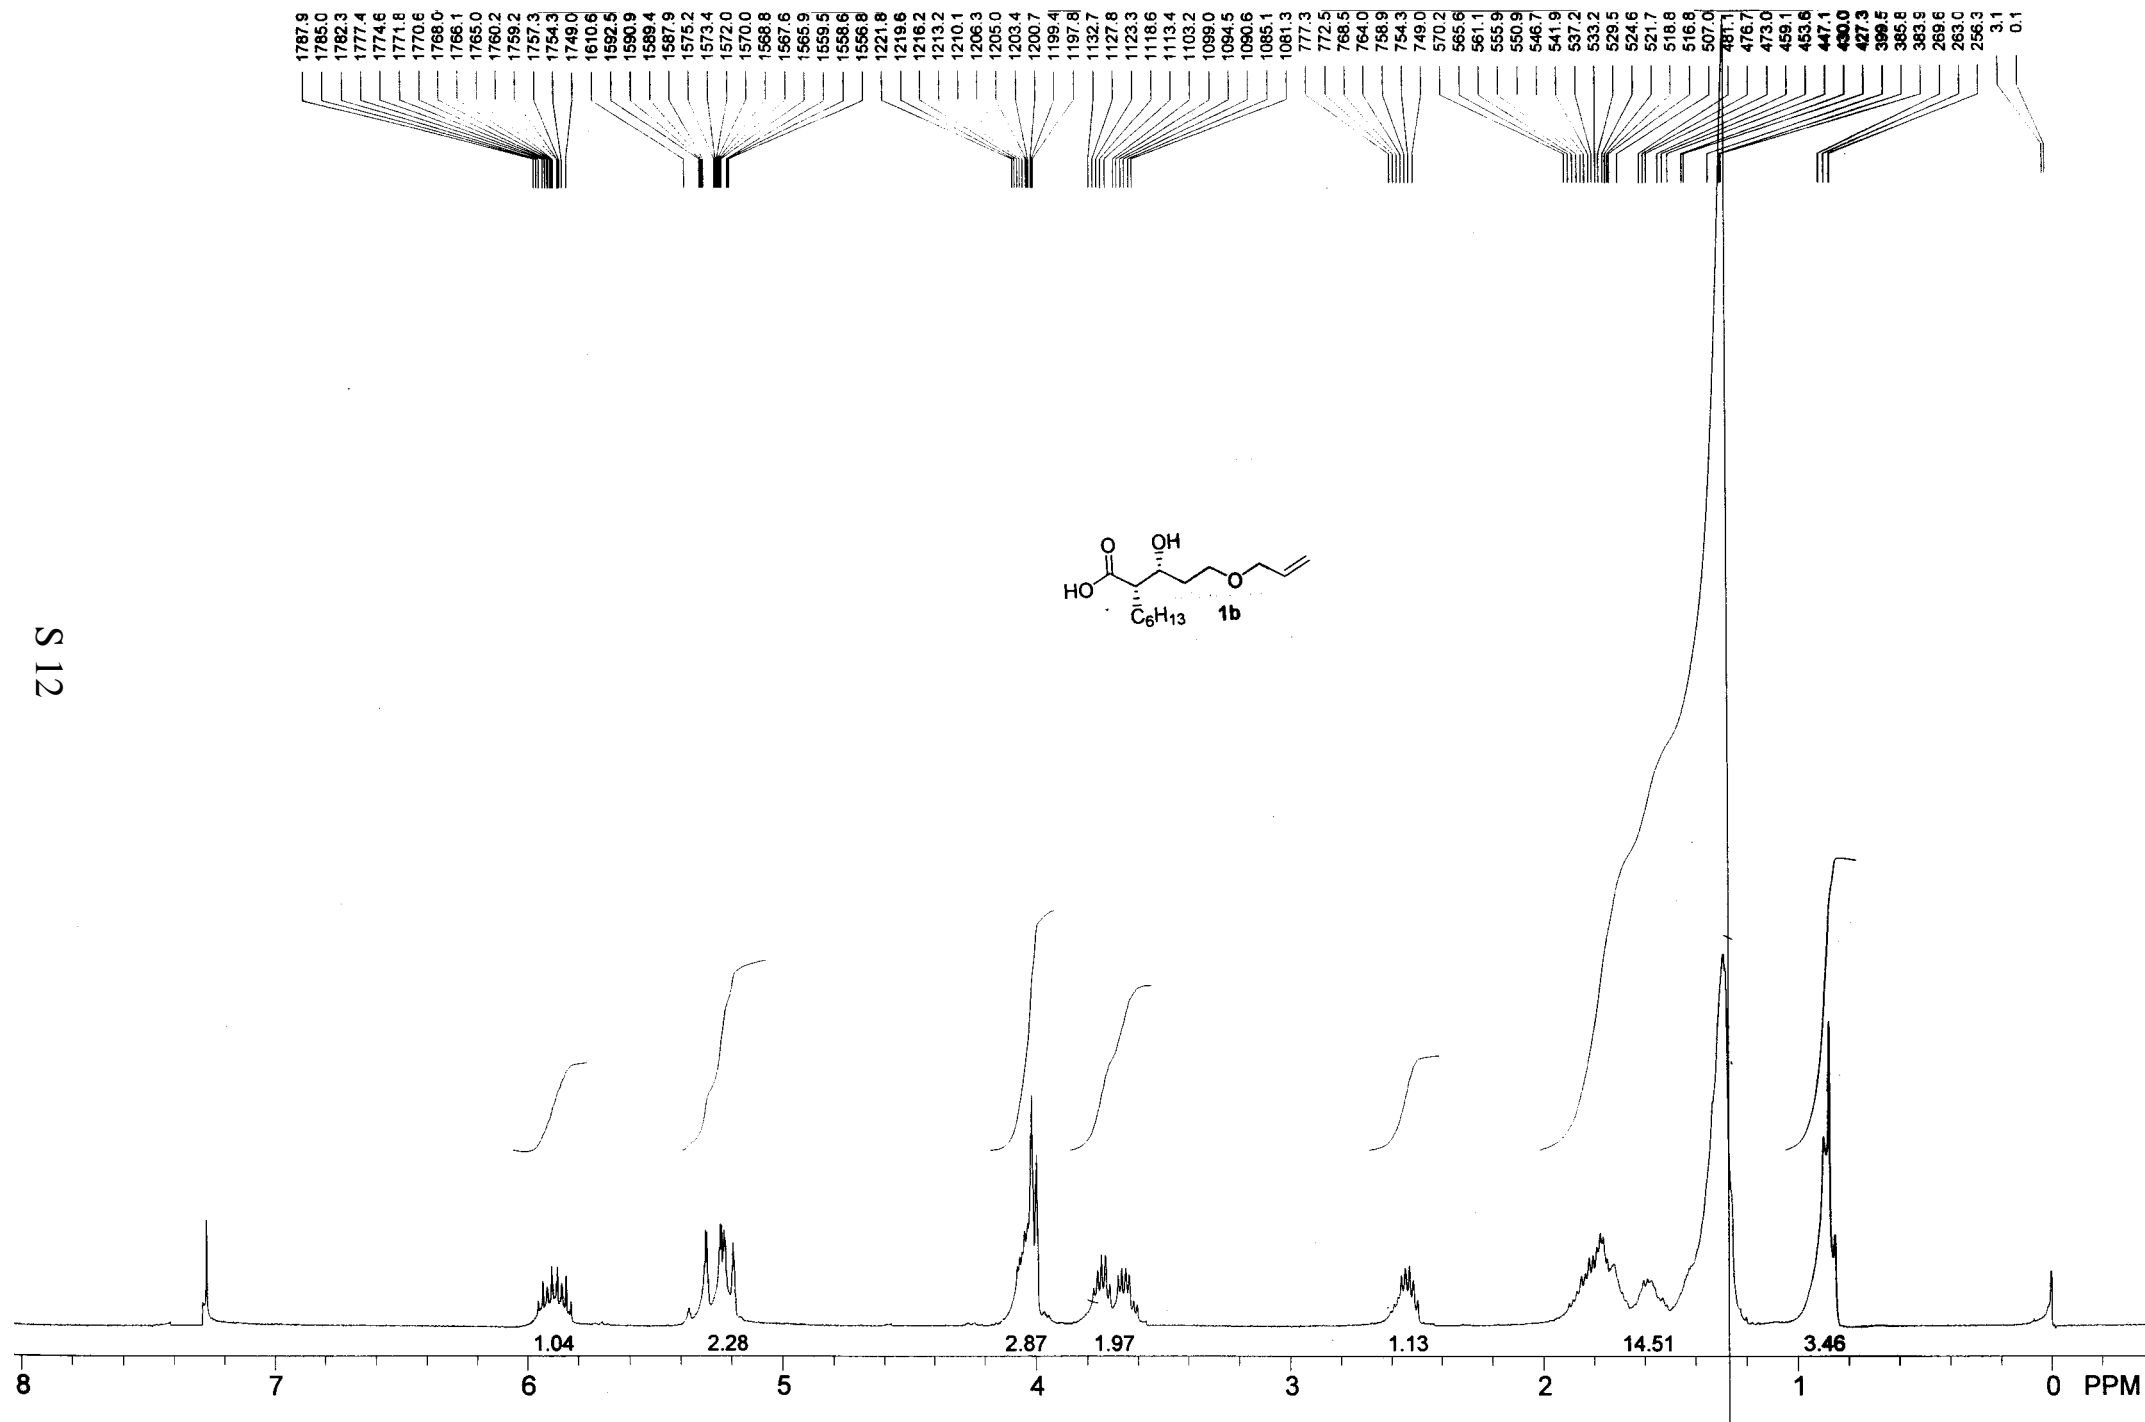

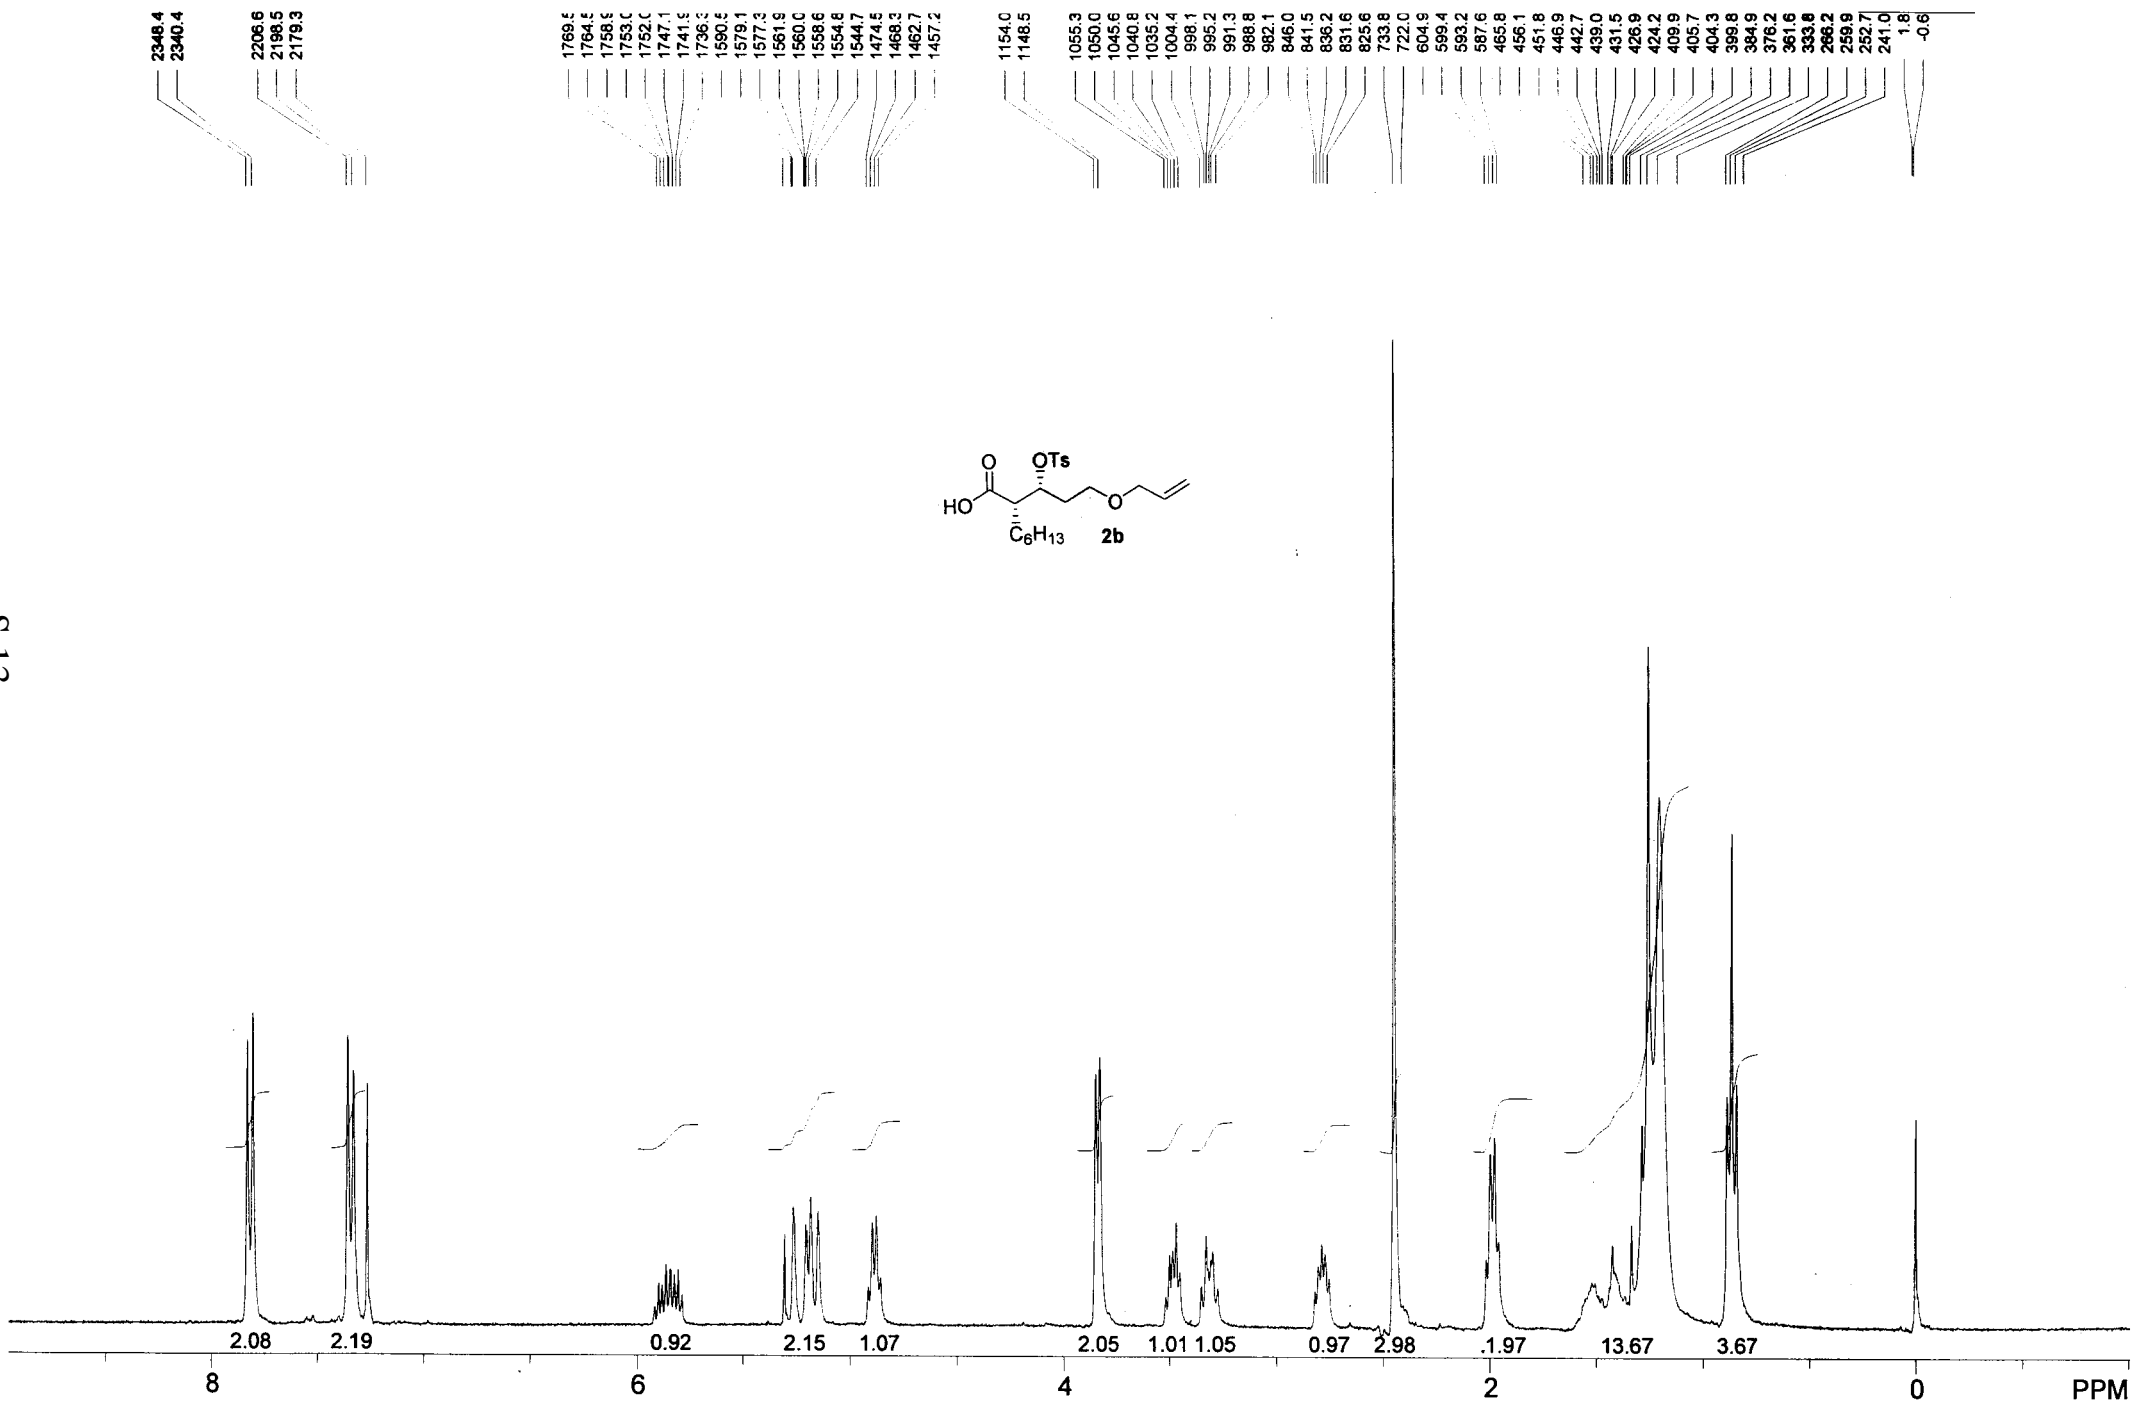

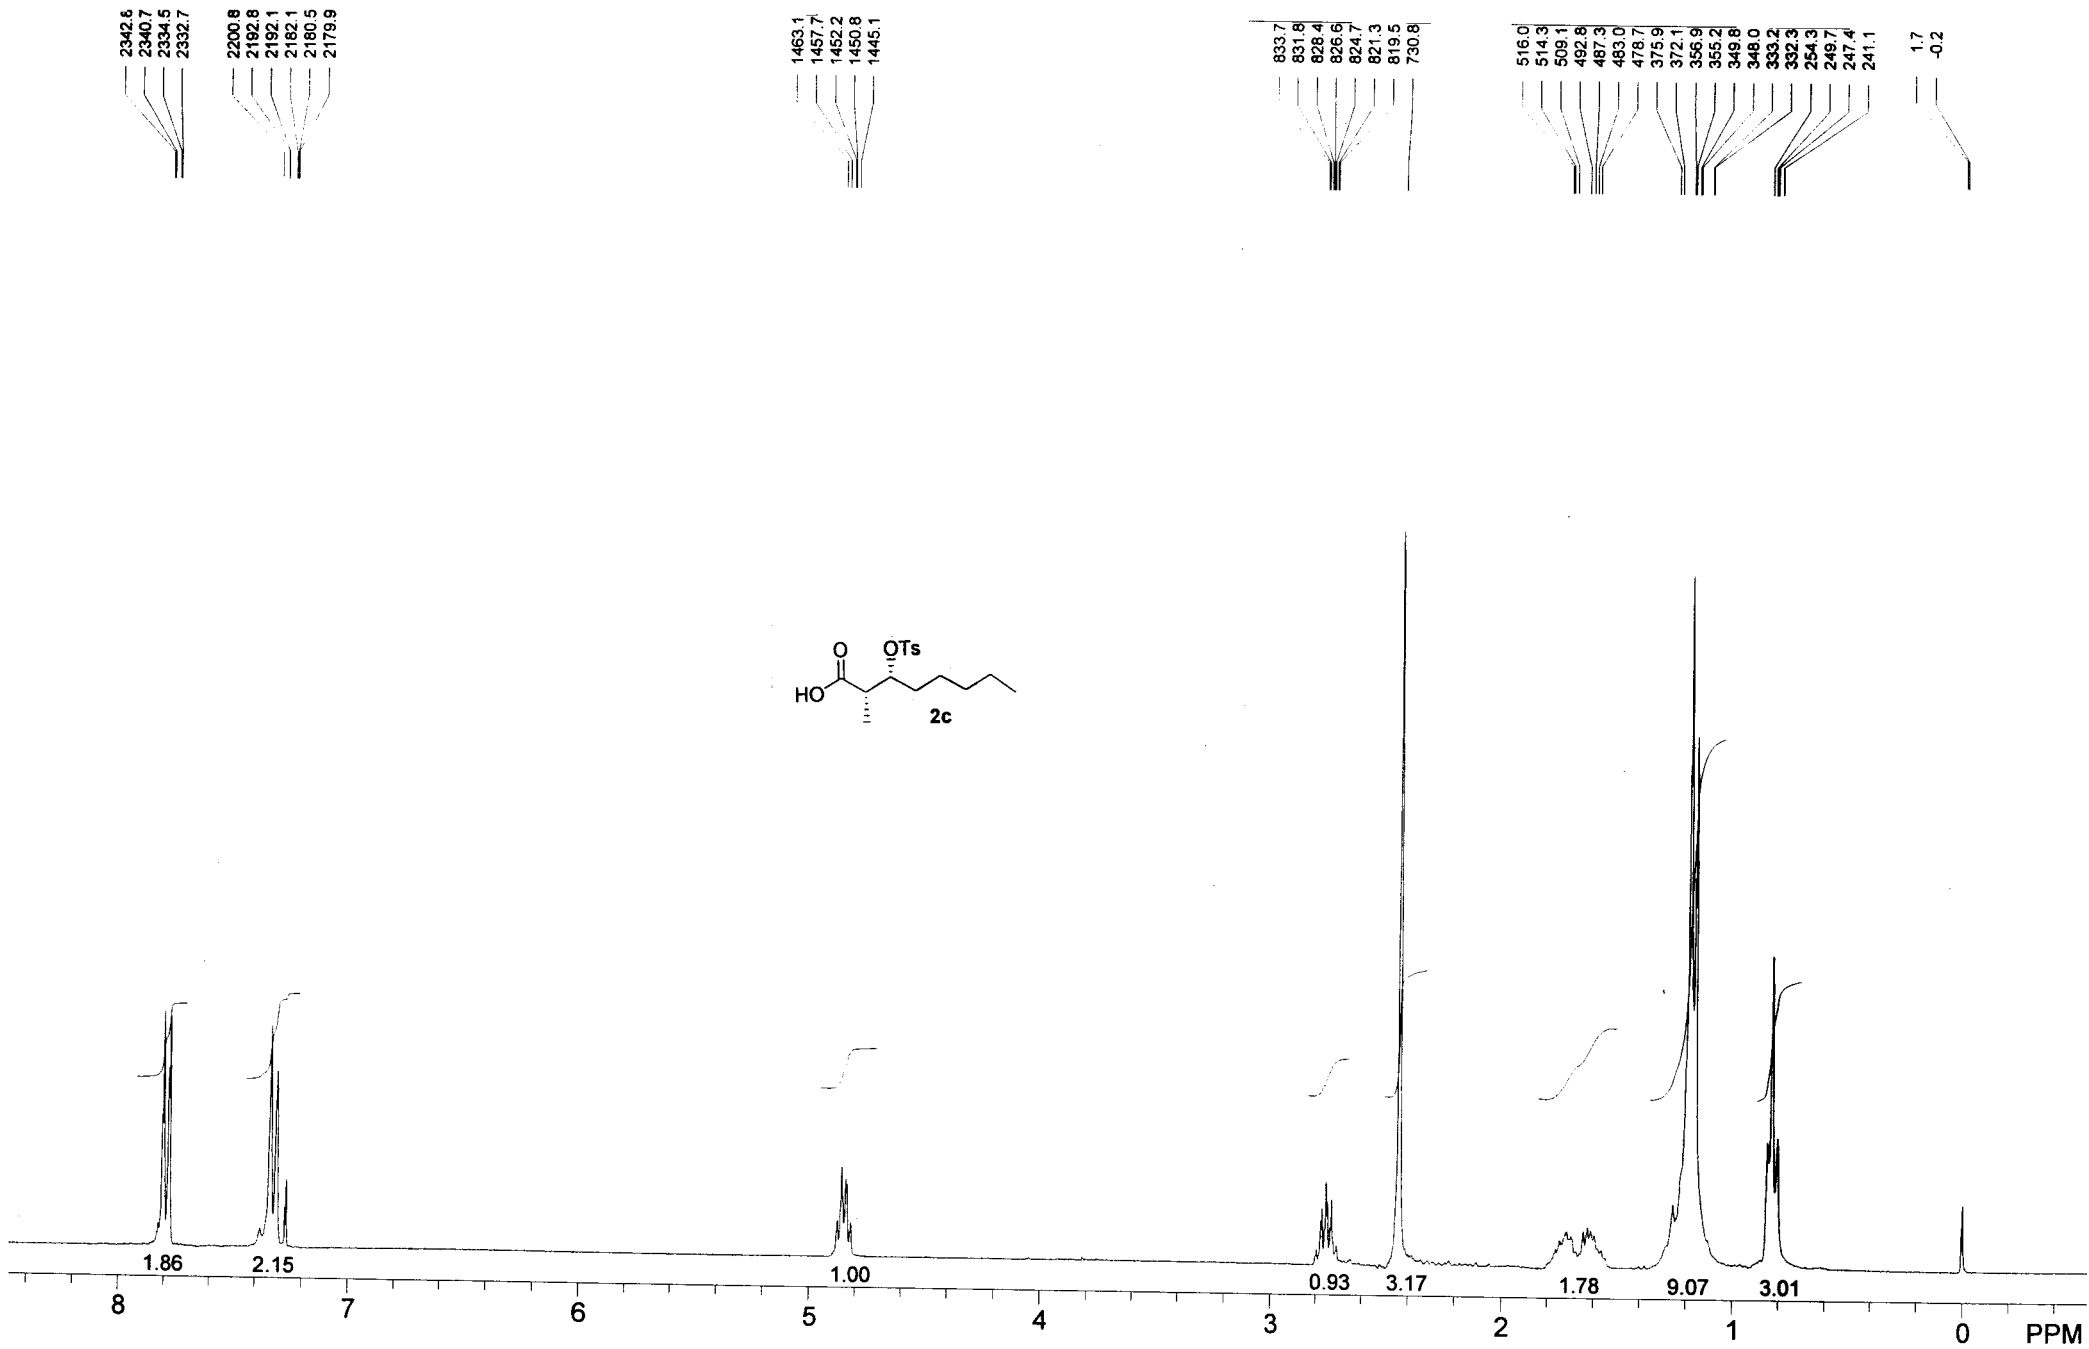

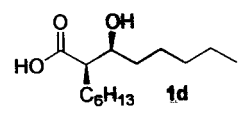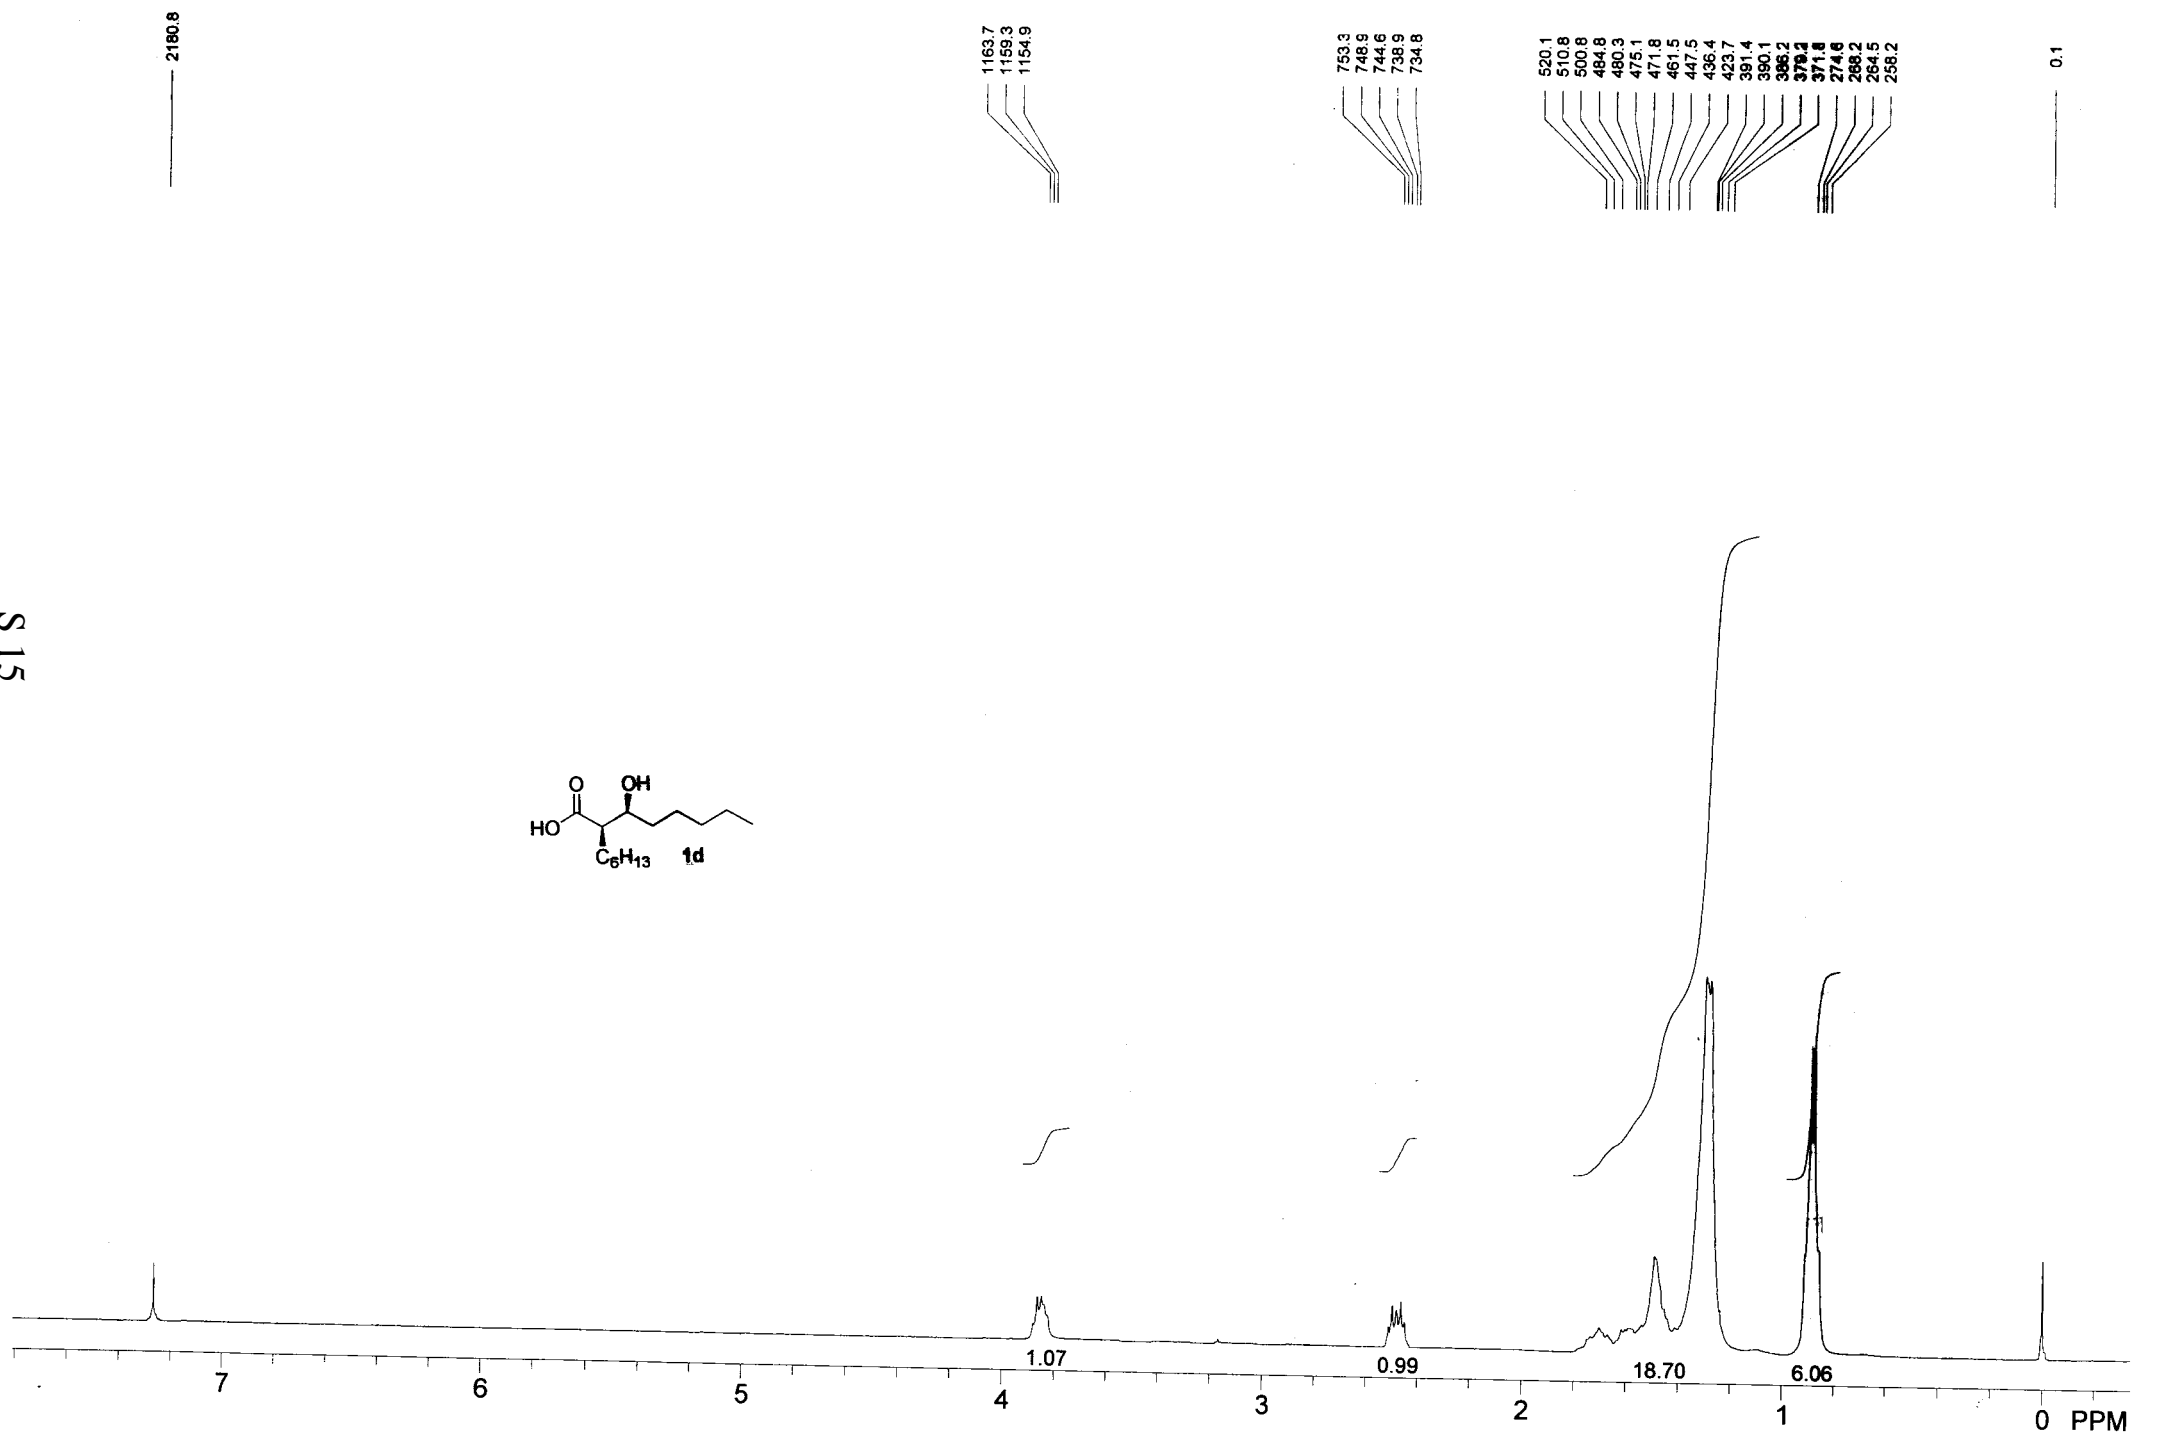

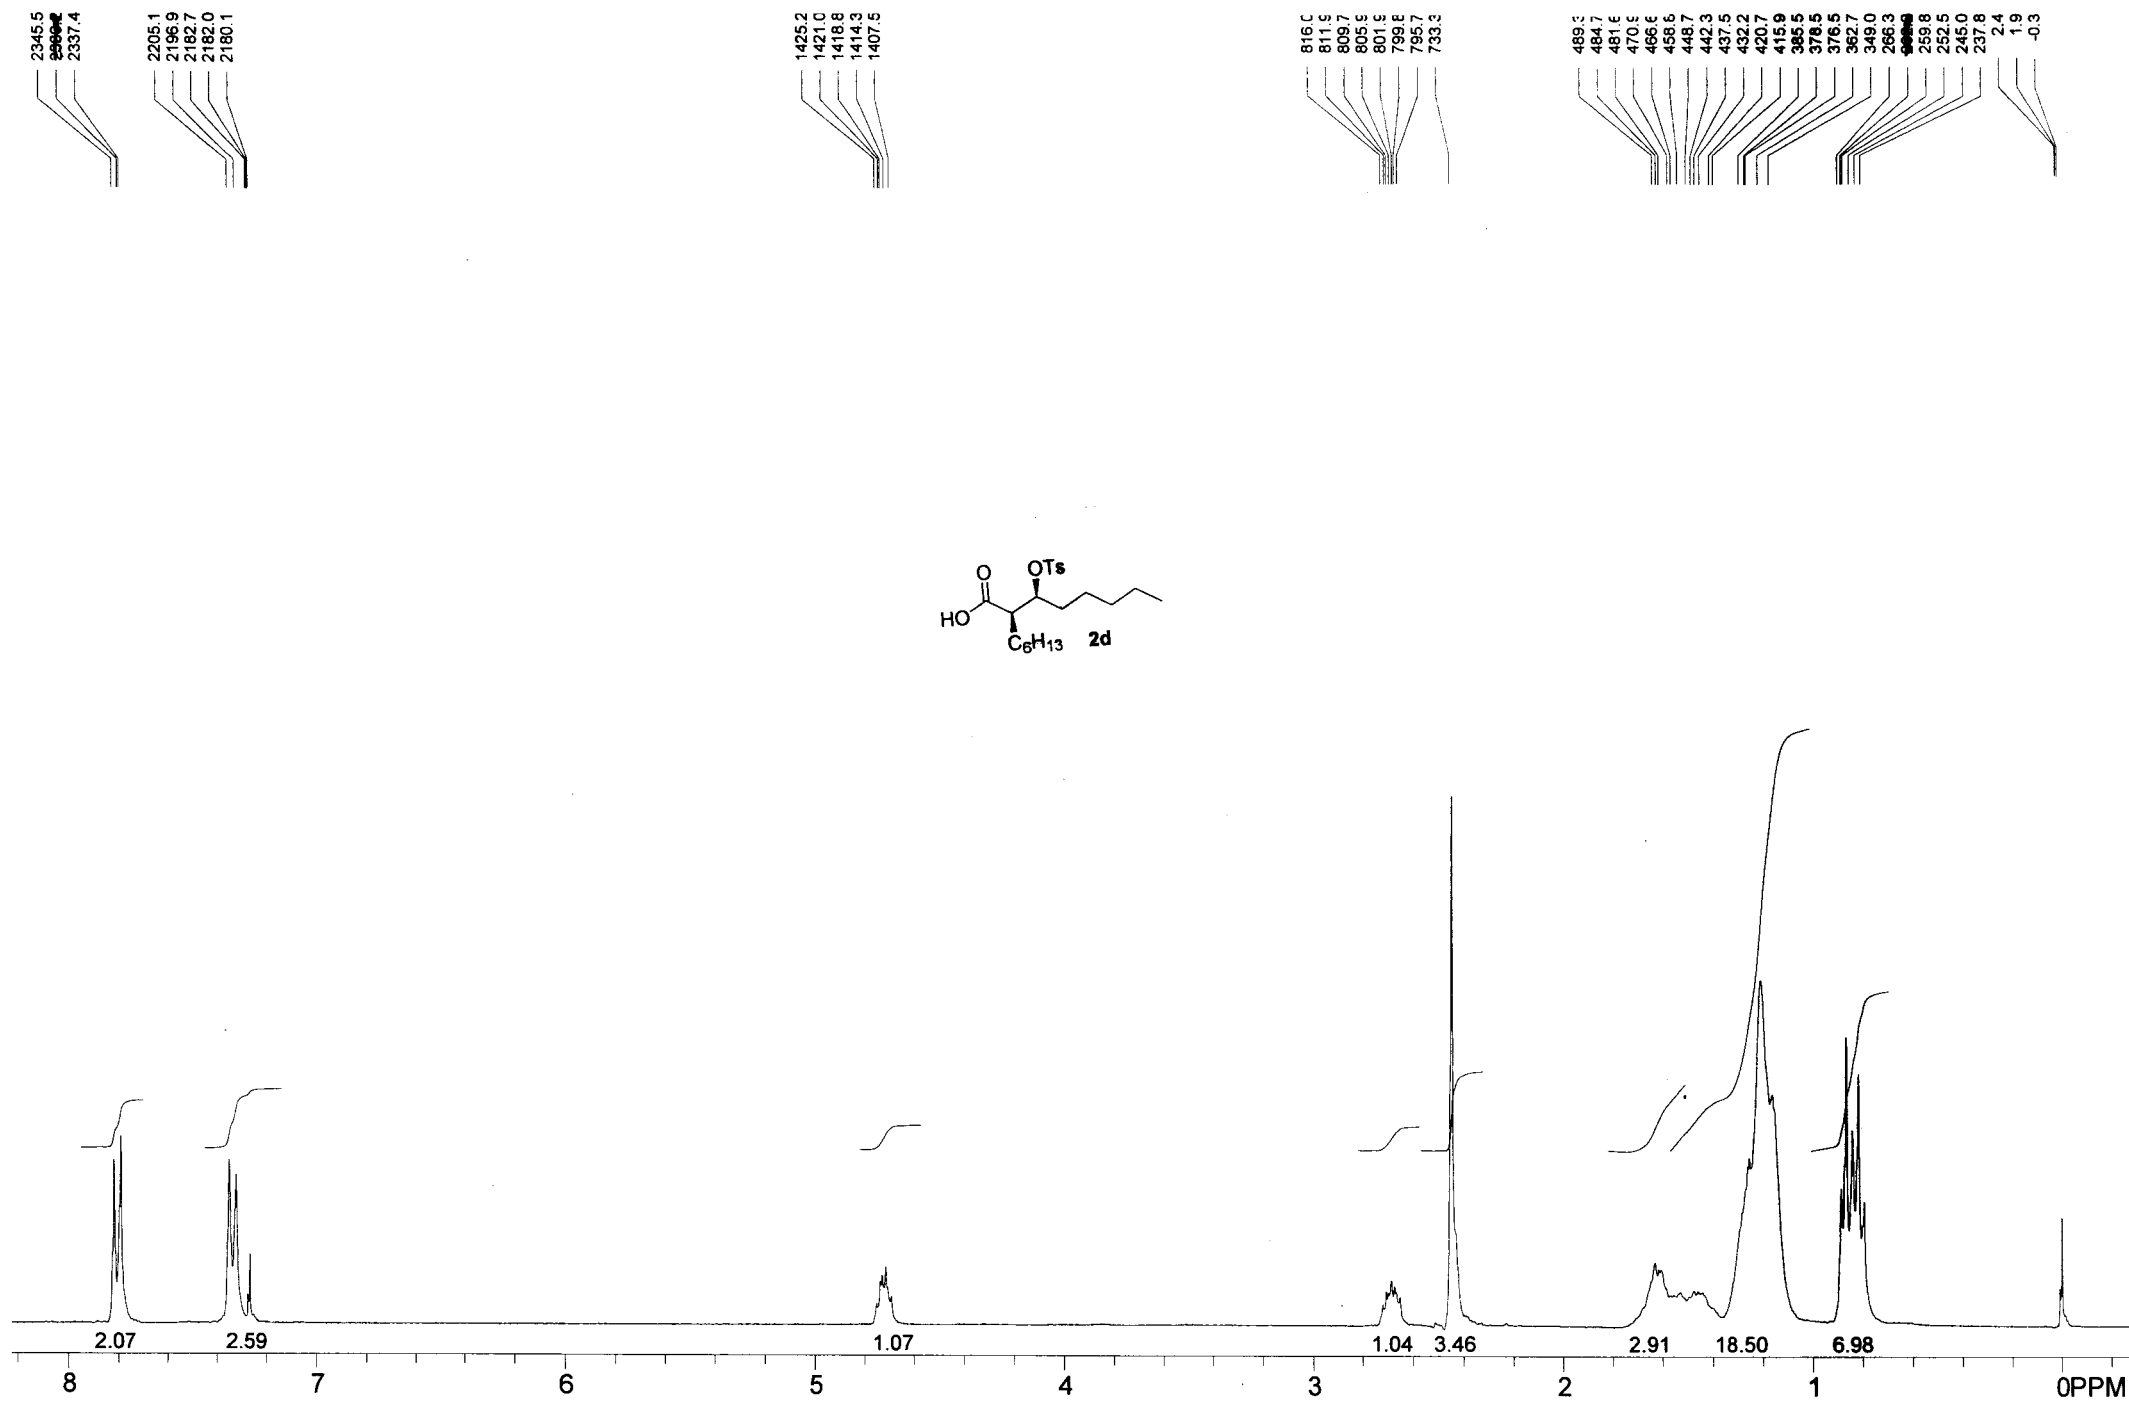



2181.4

1771.4  
1764.6  
1761.2  
1757.2  
1754.4  
1747.7  
1743.7  
1740.6  
1737.3  
1730.7  
1532.8  
1531.1  
1529.5  
1527.9  
1524.8  
1515.6  
1514.1  
1511.6  
1510.6  
1508.3  
1507.2  
1506.2  
1505.2  
1504.1  
1488.1  
1486.4  
1485.0  
1483.8  
1203.6  
1198.8  
1195.9  
1194.6  
1190.7  
1186.9

795.1  
791.5  
787.8  
784.0  
780.6  
776.9  
773.0  
769.8  
692.4  
690.9  
689.5  
685.3  
679.0  
675.0  
670.7  
664.2  
660.0  
658.6  
652.5  
651.5  
645.7  
644.2  
637.8  
631.2  
630.1  
508.0  
501.9  
498.7  
493.9  
490.1  
488.3  
485.3  
478.2  
476.2  
471.3  
470.5  
467.8  
464.8  
462.8  
458.3  
456.7  
455.6  
453.7  
451.7  
448.6  
448.6  
445.0  
442.2  
399.3  
385.8  
370.3  
362.7  
358.0  
0.2

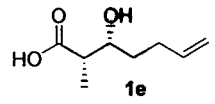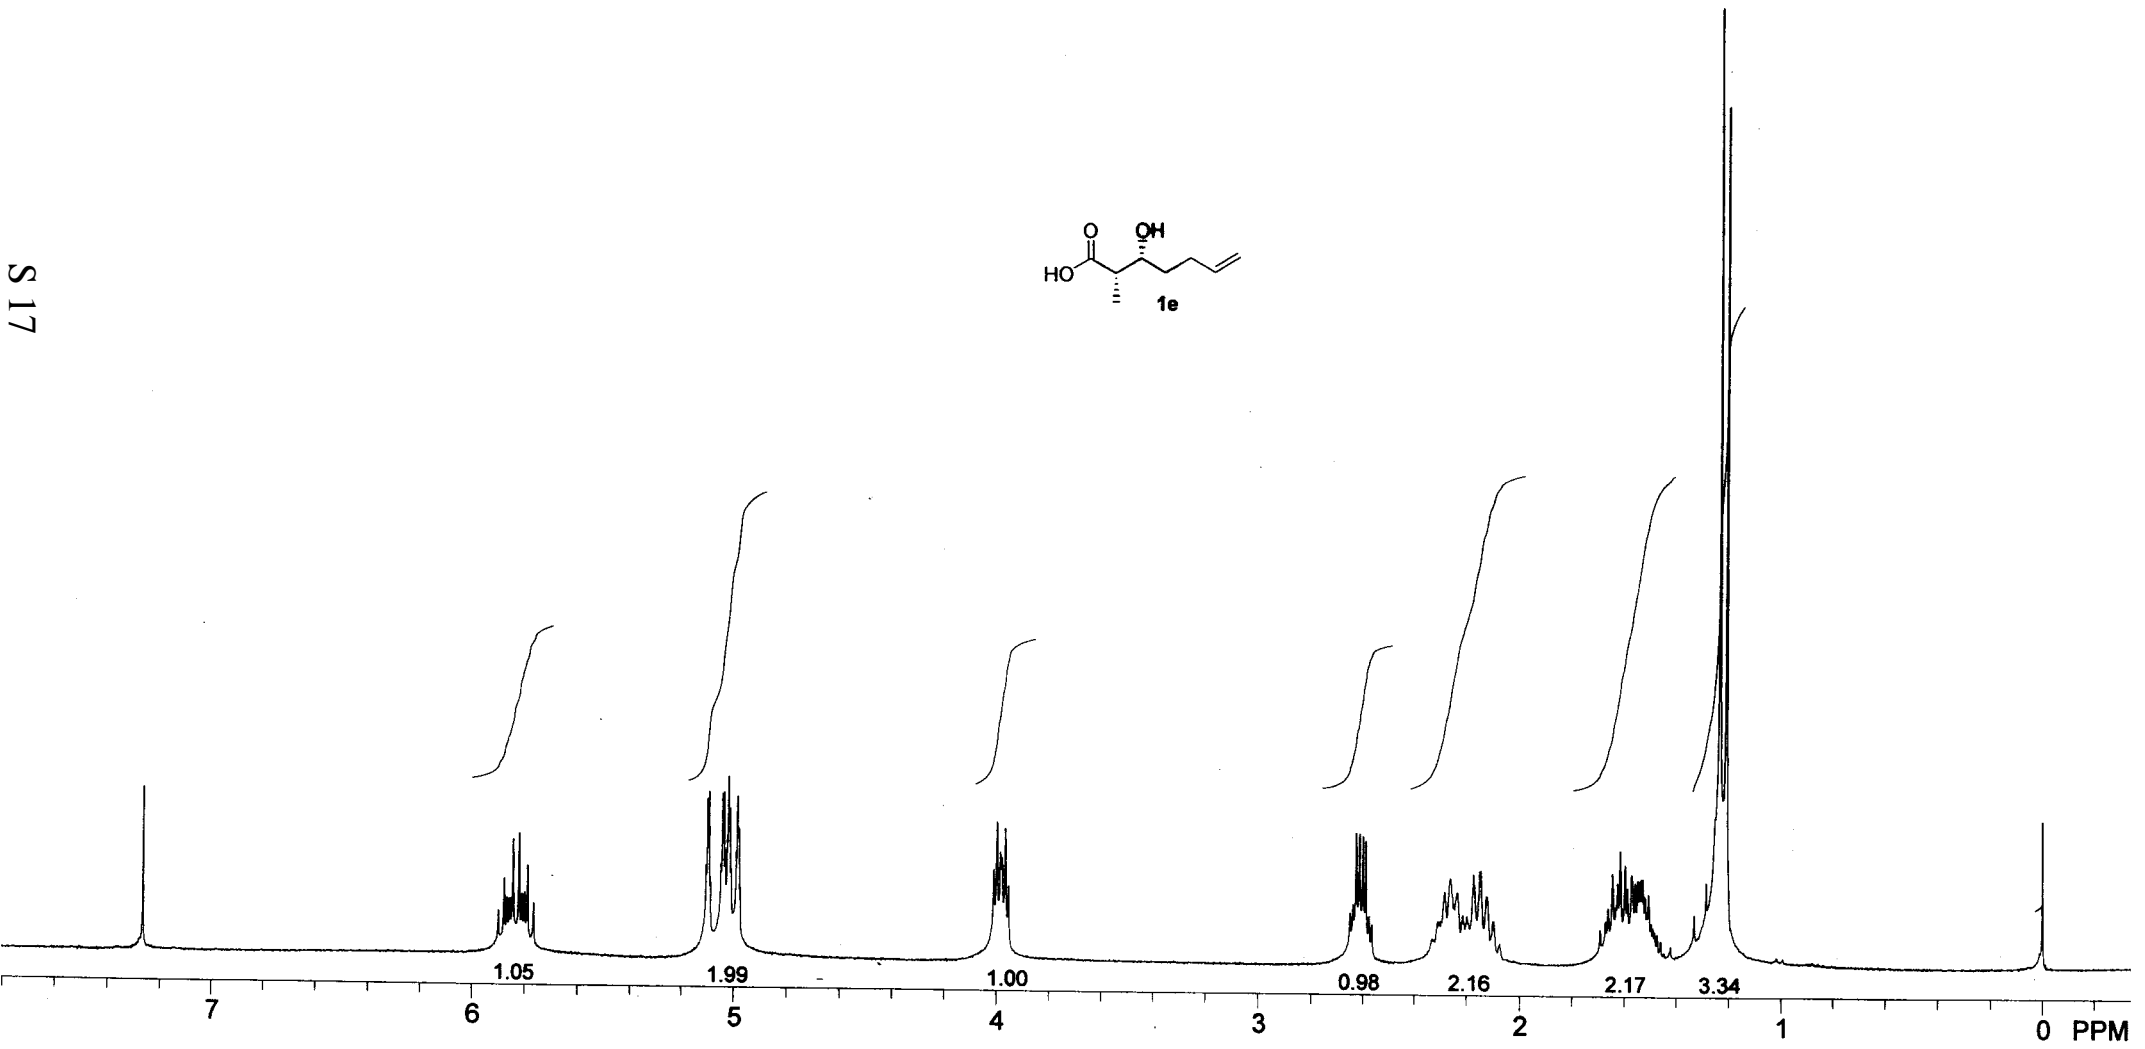

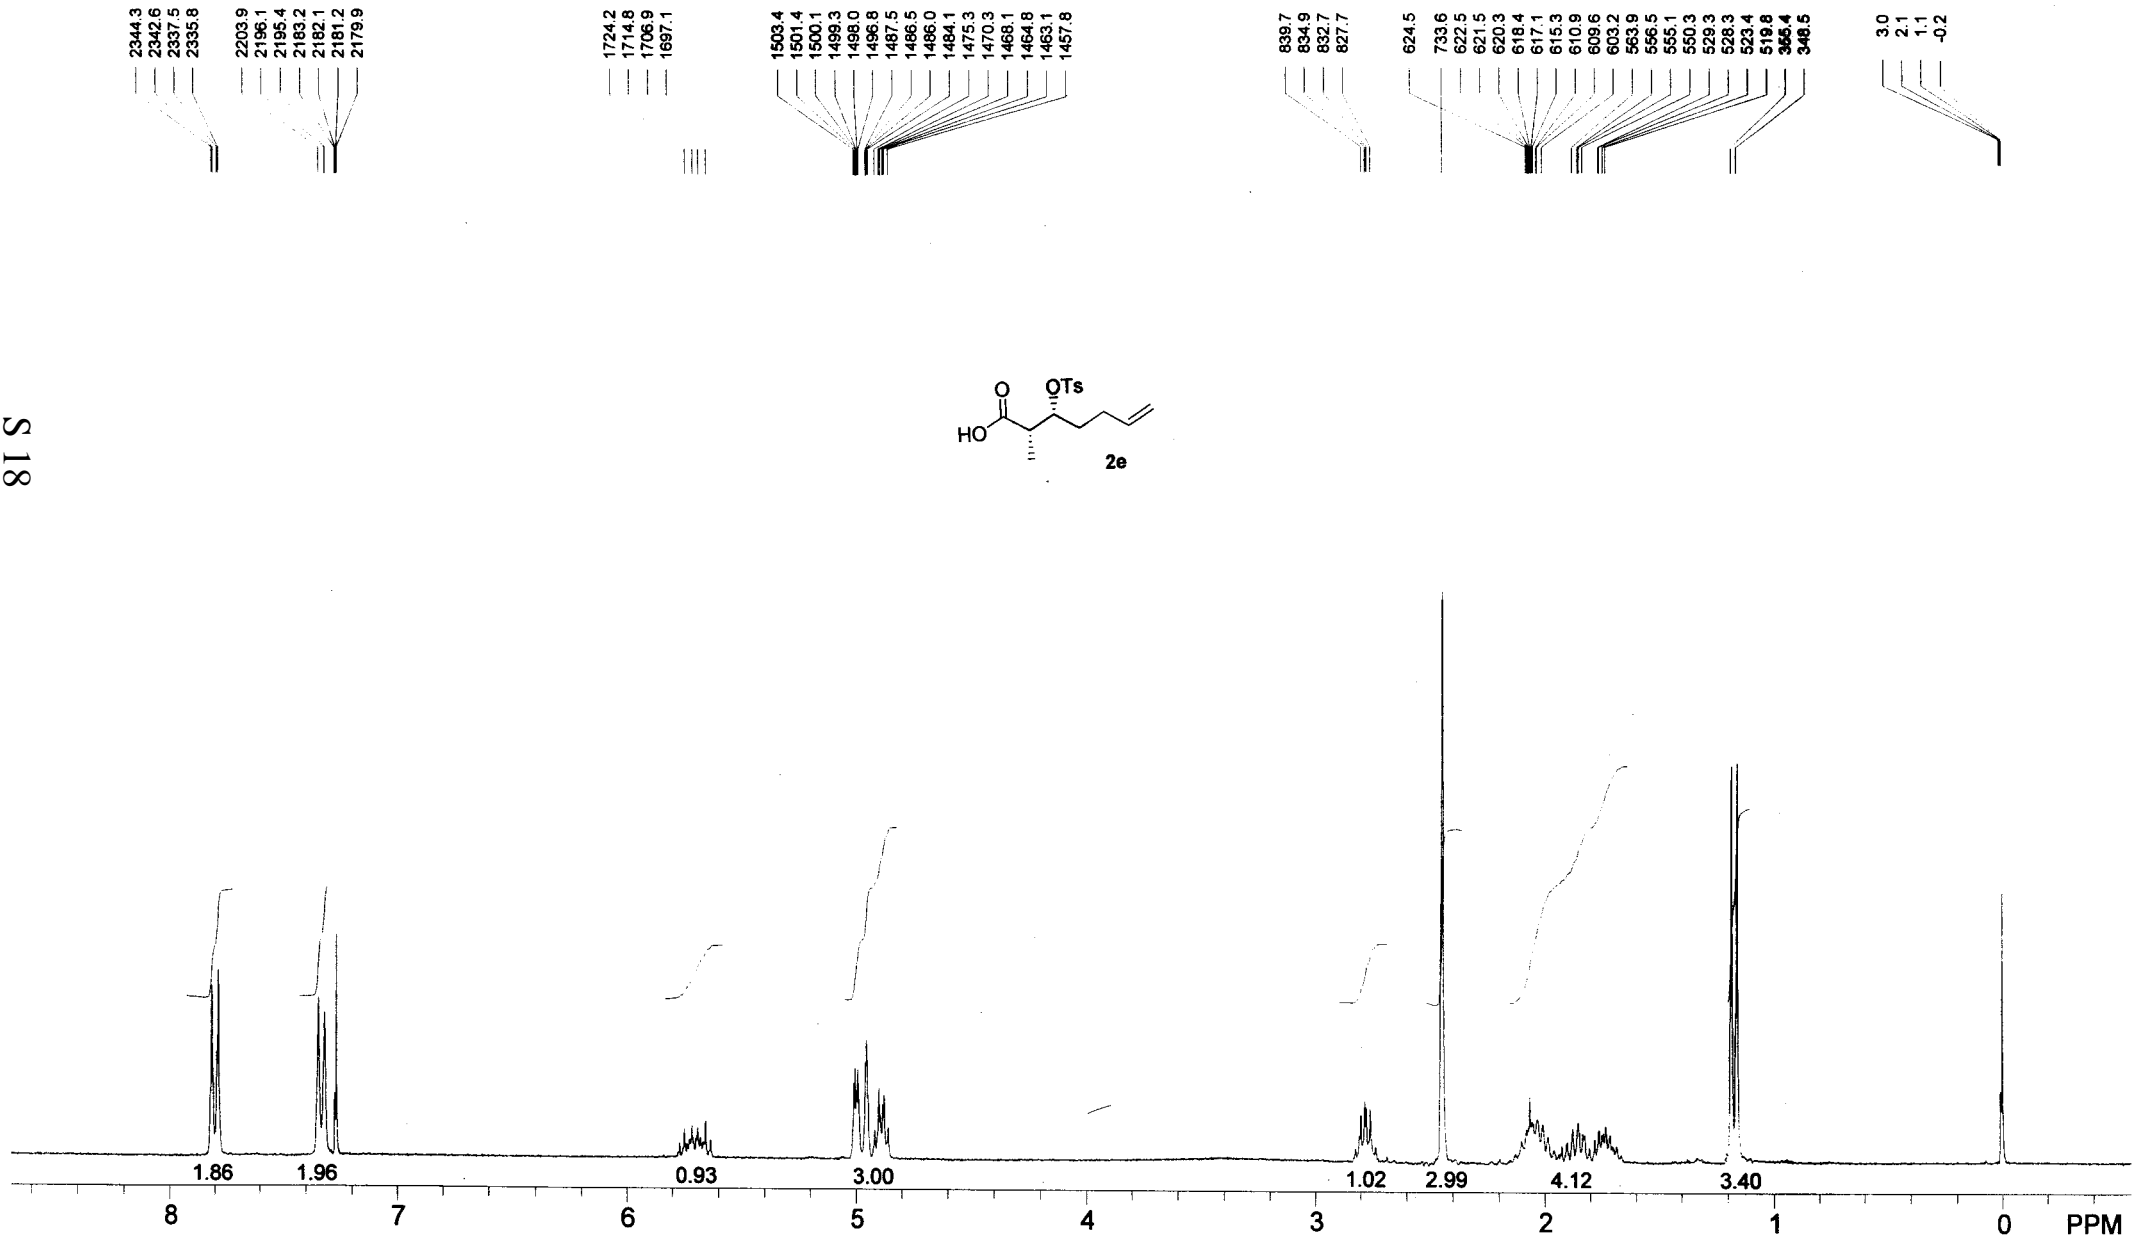

61 S

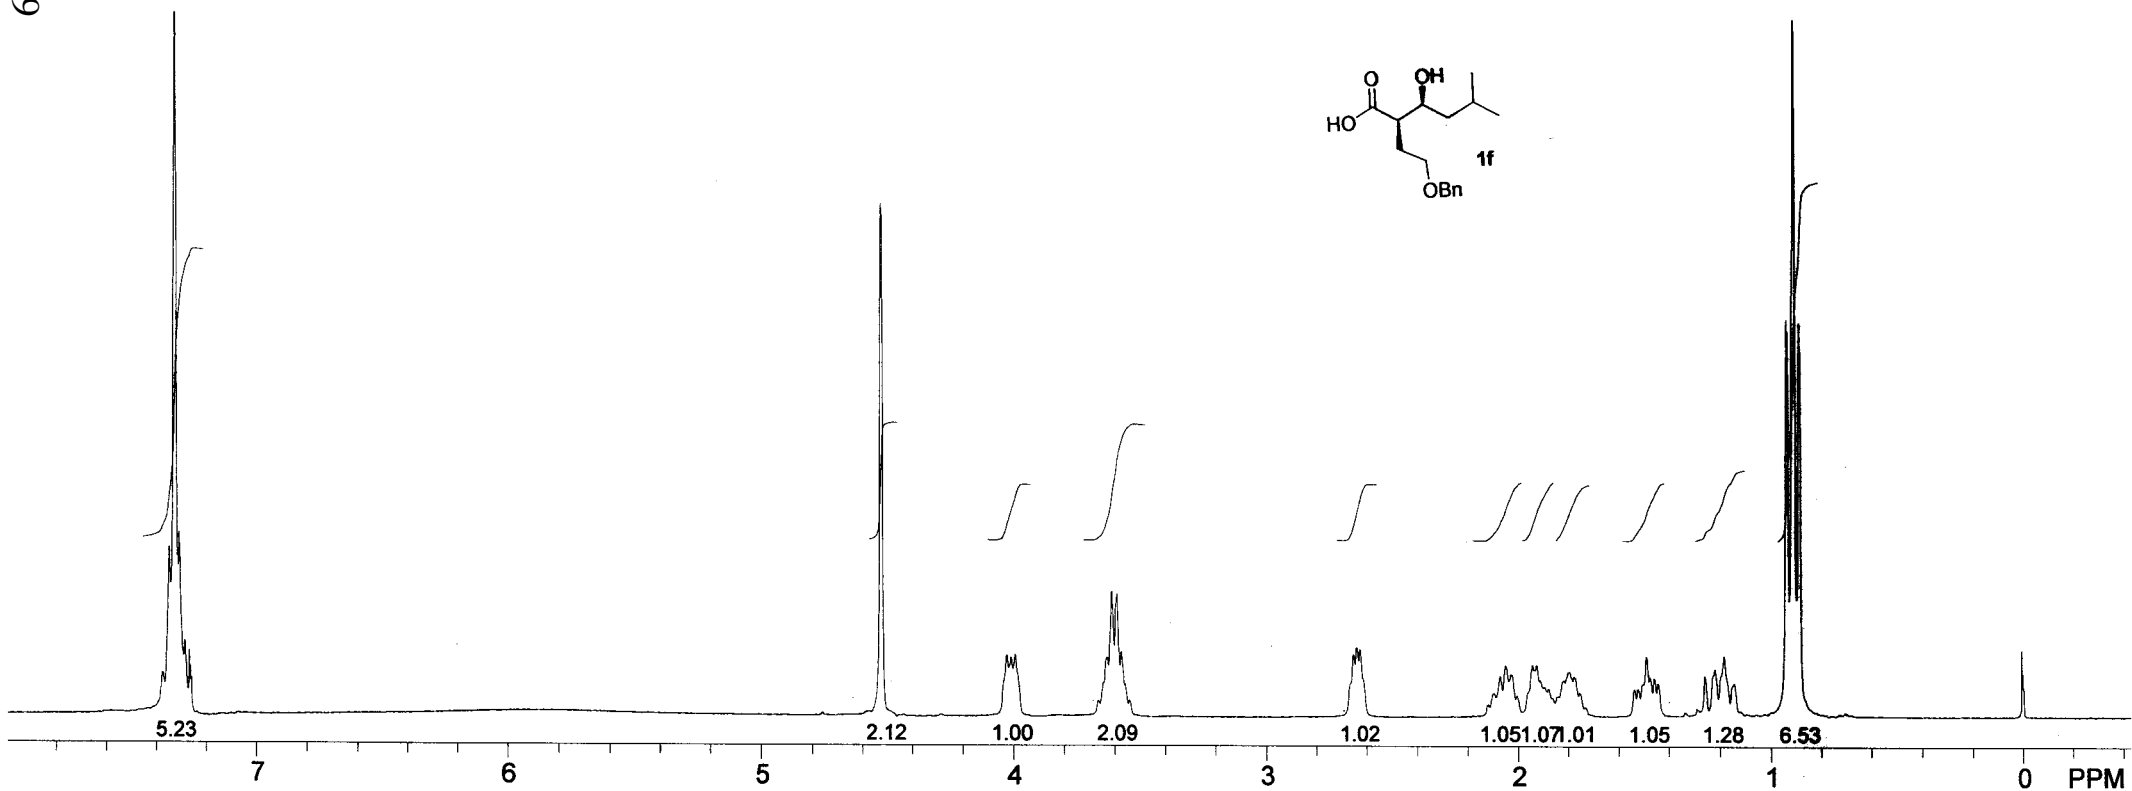

2213.3  
2212.1  
2204.9  
2198.7  
2194.9  
2193.3  
2186.2  
2180.4  
2179.3  
2178.0

1358.4  
1357.8

1207.9  
1203.2  
1198.6

1089.6  
1083.9  
1077.6  
1072.4  
1067.8

786.5  
782.8  
786.5

628.9  
621.9  
615.1  
608.9  
602.0  
583.7  
581.3  
578.9  
574.5  
568.8  
563.9  
551.8  
546.9  
545.3  
540.6  
538.7  
534.0  
532.2  
527.2  
461.4  
456.9  
451.5  
447.5  
443.5  
438.5  
433.5  
378.3  
368.7  
356.1  
343.7  
282.7  
281.5  
274.5  
267.8  
266.9  
2.3  
1.0  
-0.3

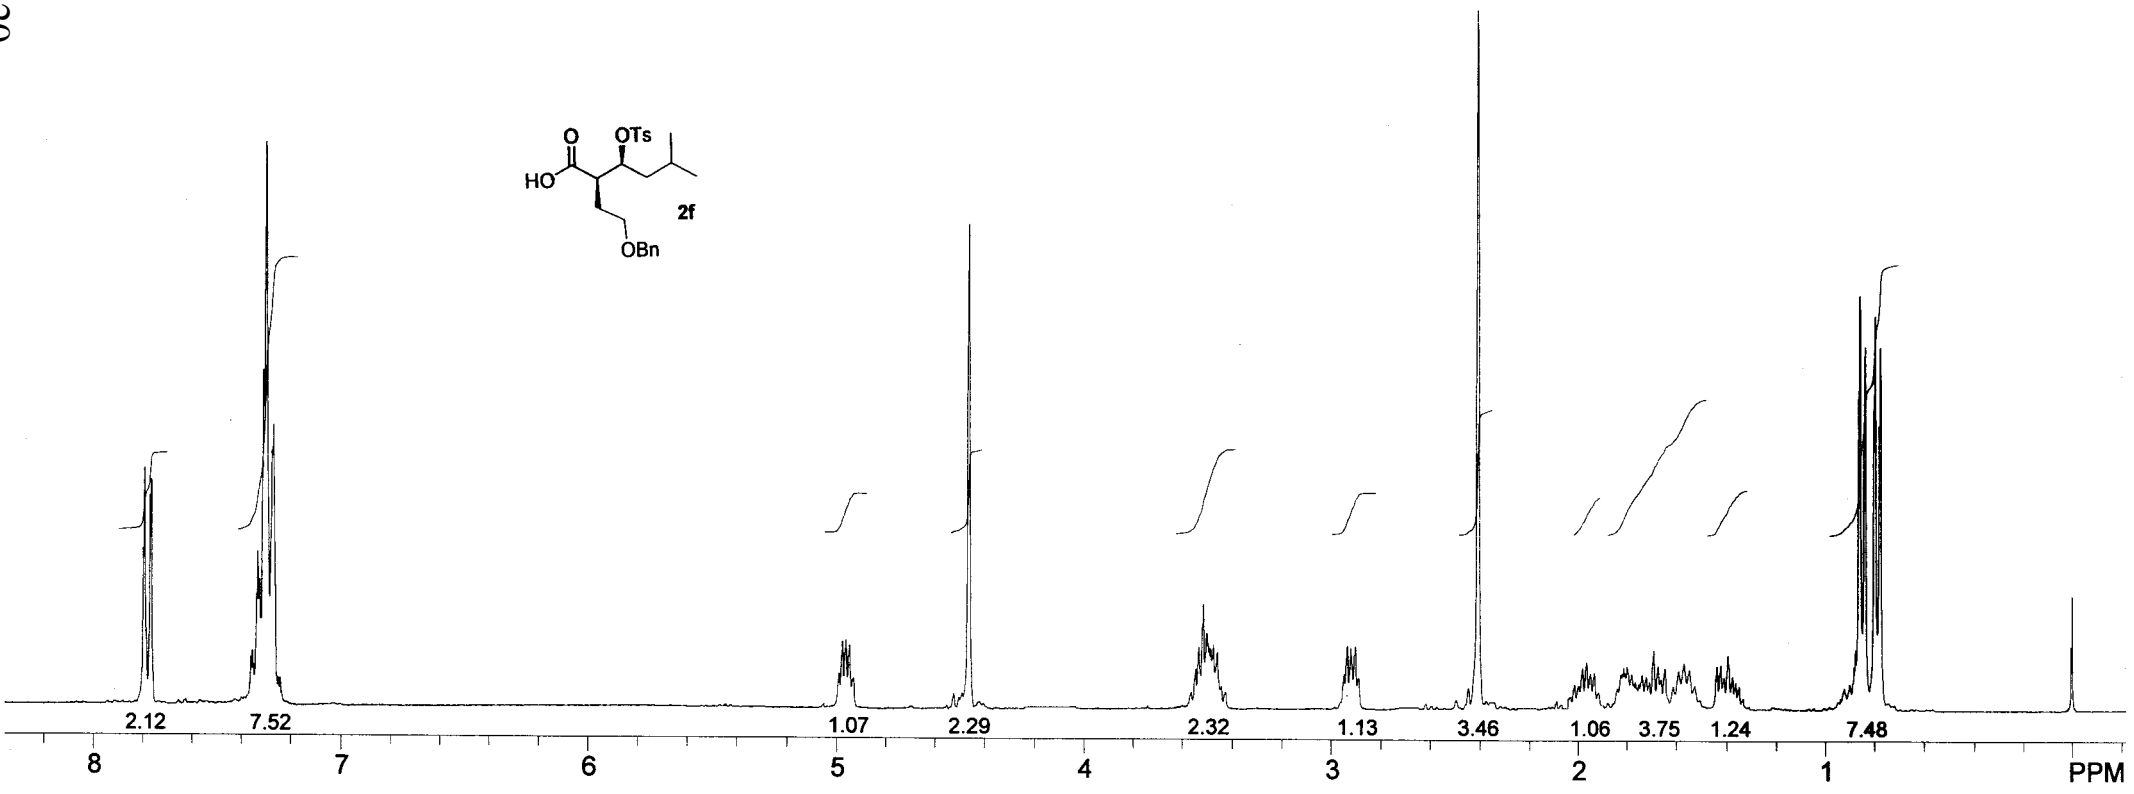

7.797  
7.752  
7.766  
7.771  
7.764  
7.360  
7.354  
7.349  
7.336  
7.333  
7.326  
7.324  
7.320  
7.308  
7.307  
7.297  
7.274  
7.272  
7.268

4.990  
4.976  
4.961  
4.947  
4.933

4.460

3.549  
3.544  
3.532  
3.513  
3.500  
3.495  
3.490  
3.484  
3.479  
3.474  
3.457  
2.949  
2.934  
2.921  
2.902  
2.888  
2.406

1.983  
1.967  
1.951  
1.934  
1.927  
1.820  
1.814  
1.807  
1.799  
1.780  
1.766  
1.735  
1.722  
1.708  
1.692  
1.675  
1.662  
1.647  
1.591  
1.587  
1.586  
1.547  
1.438  
1.424  
1.411  
1.395  
1.376  
0.883  
0.877  
0.863  
0.855  
0.842  
0.836  
0.801  
0.797  
0.780  
0.776  
0.004  
-0.001

S 21

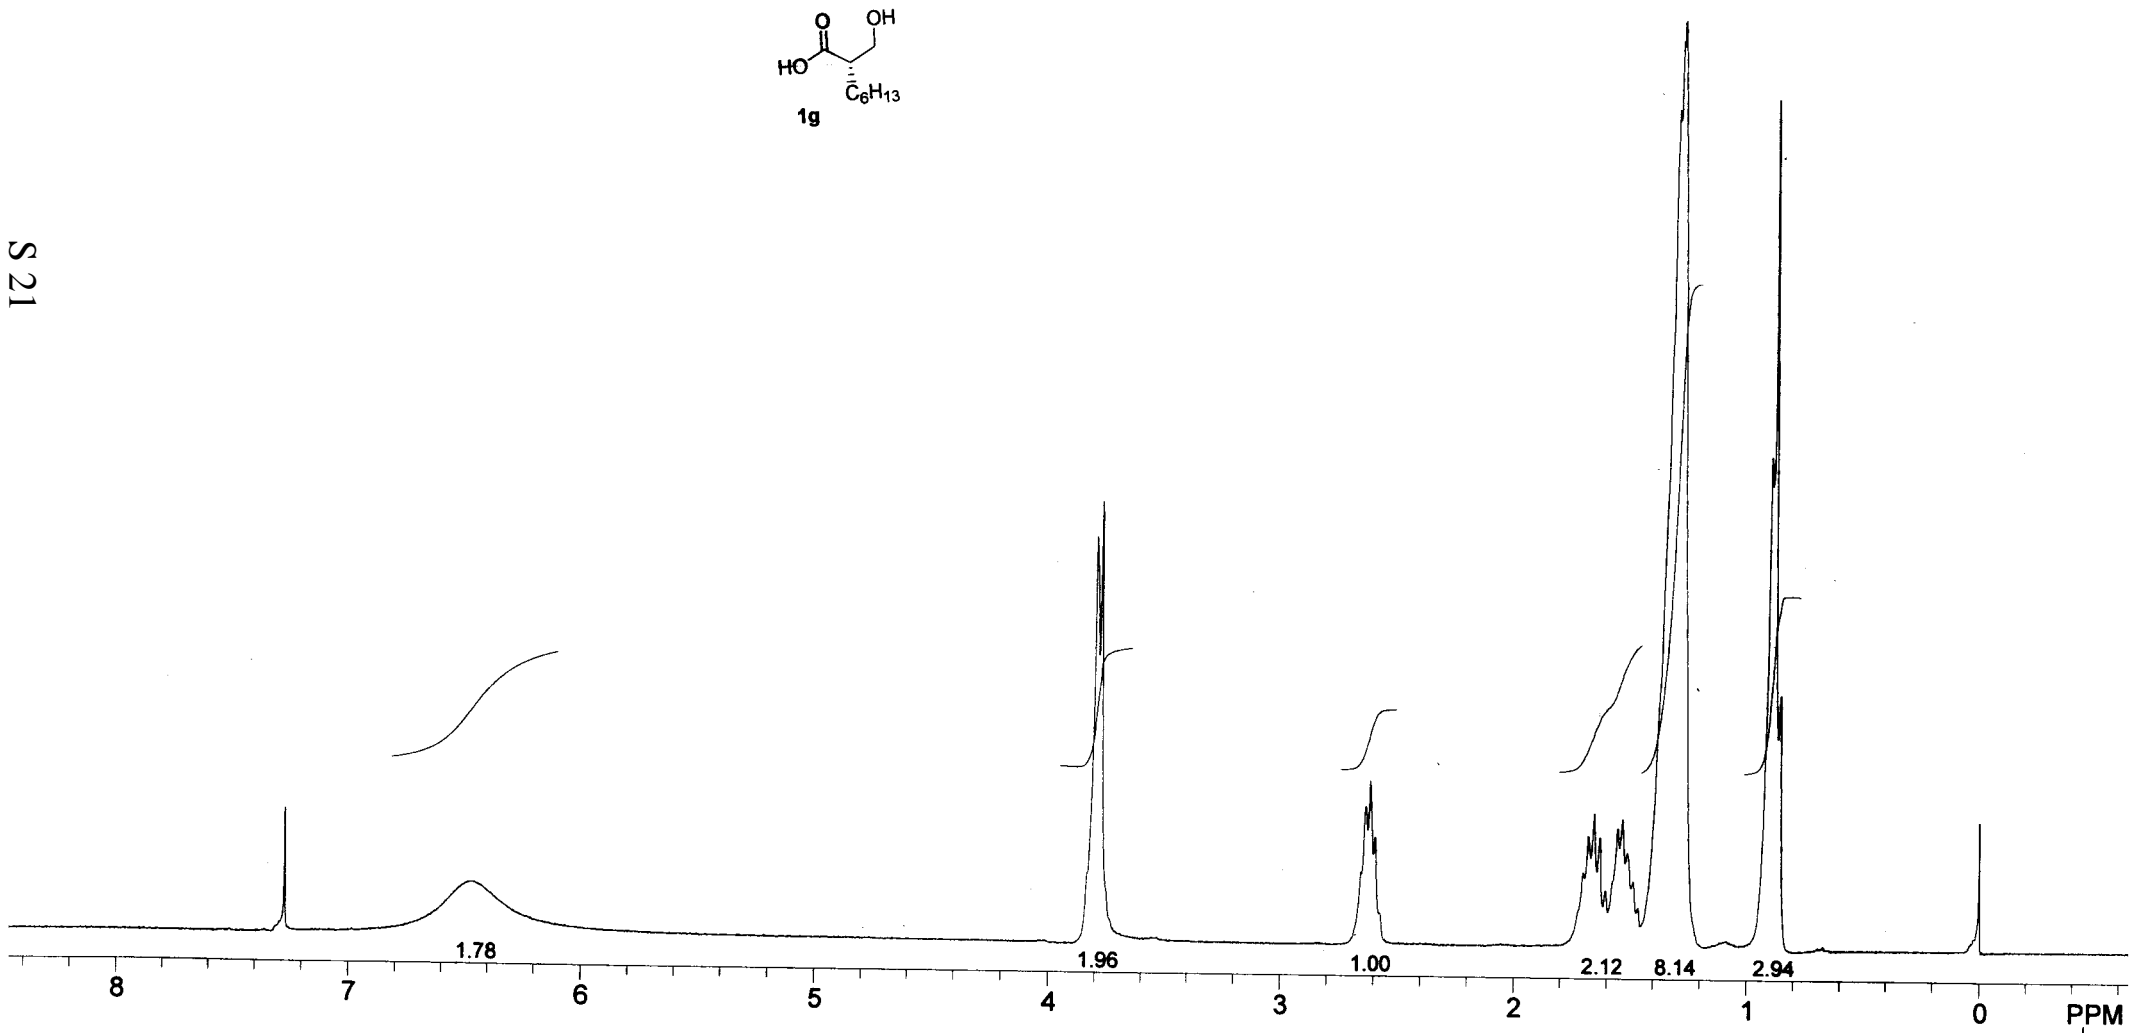

2182.0

1916.9  
1802.0  
1940.5

1136.8  
1132.6

796.8  
790.8  
785.1  
778.5  
772.2

510.5  
503.5  
496.4  
489.3  
482.1  
466.0  
459.5  
454.1  
446.2  
439.2  
391.5  
387.2  
385.6  
384.8  
270.7  
264.0  
267.8

-0.0



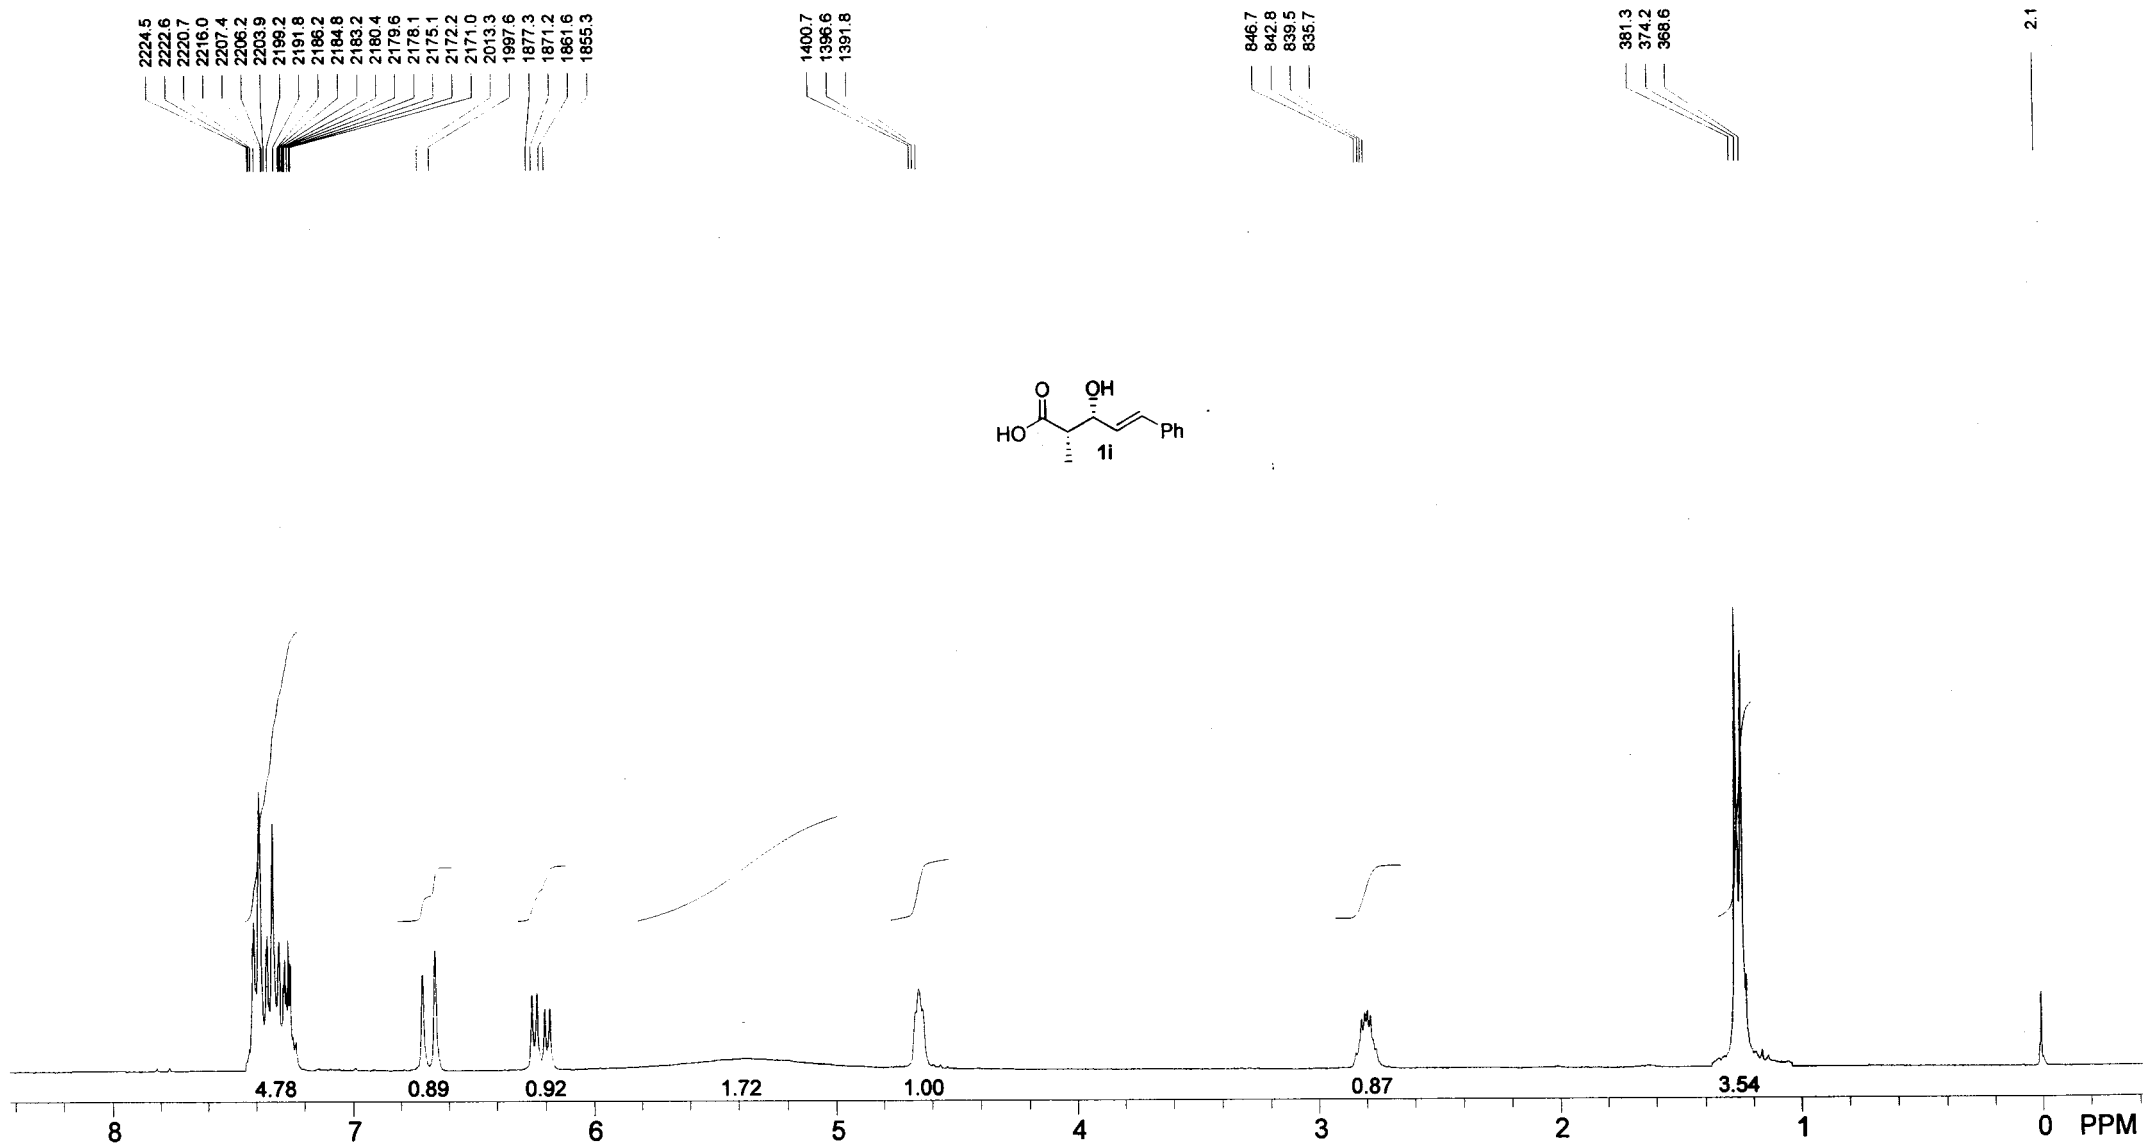

S 24

2218.2

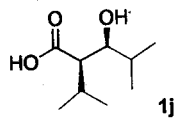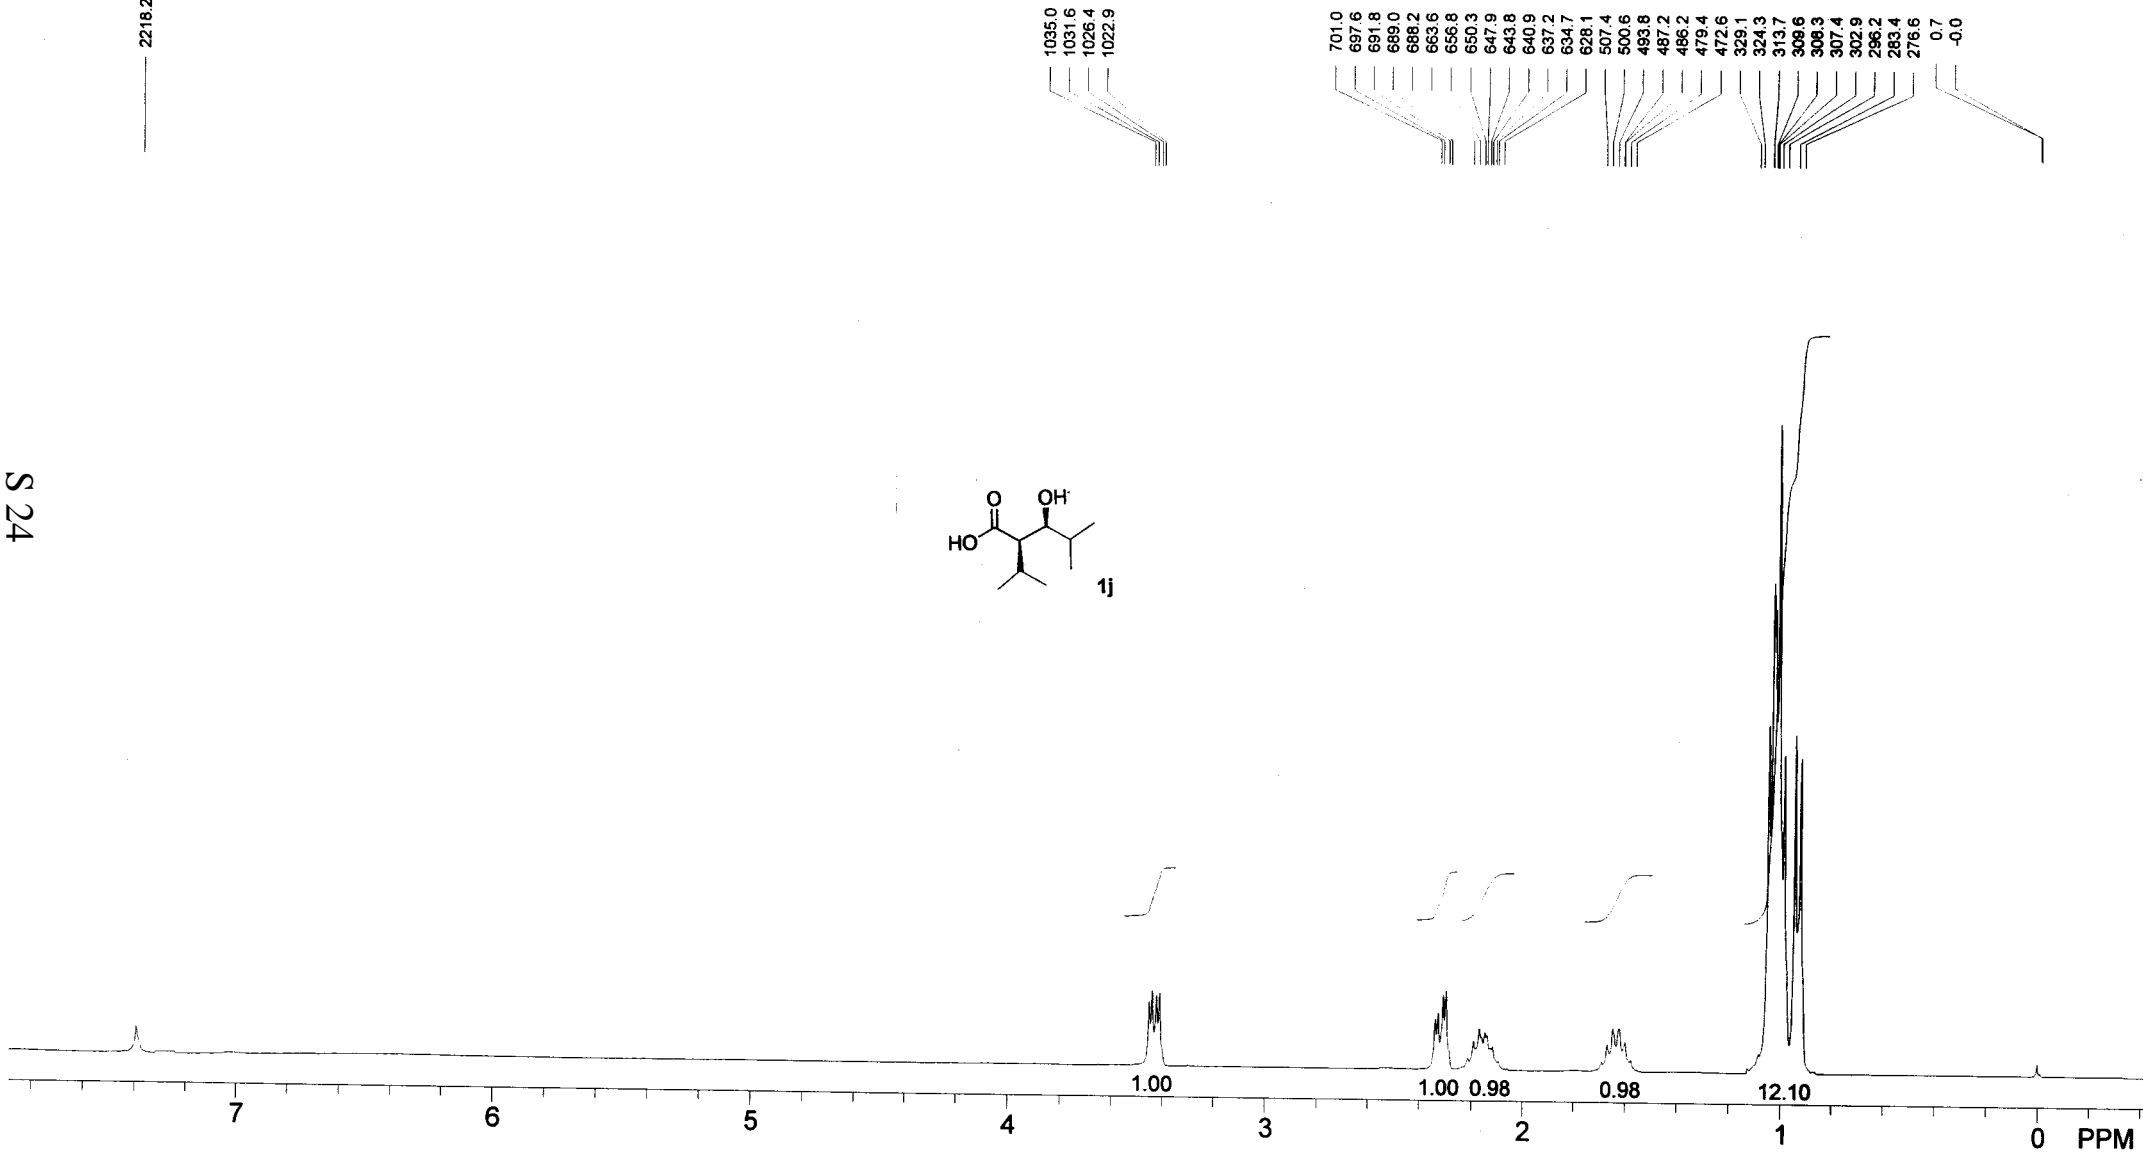



S 25

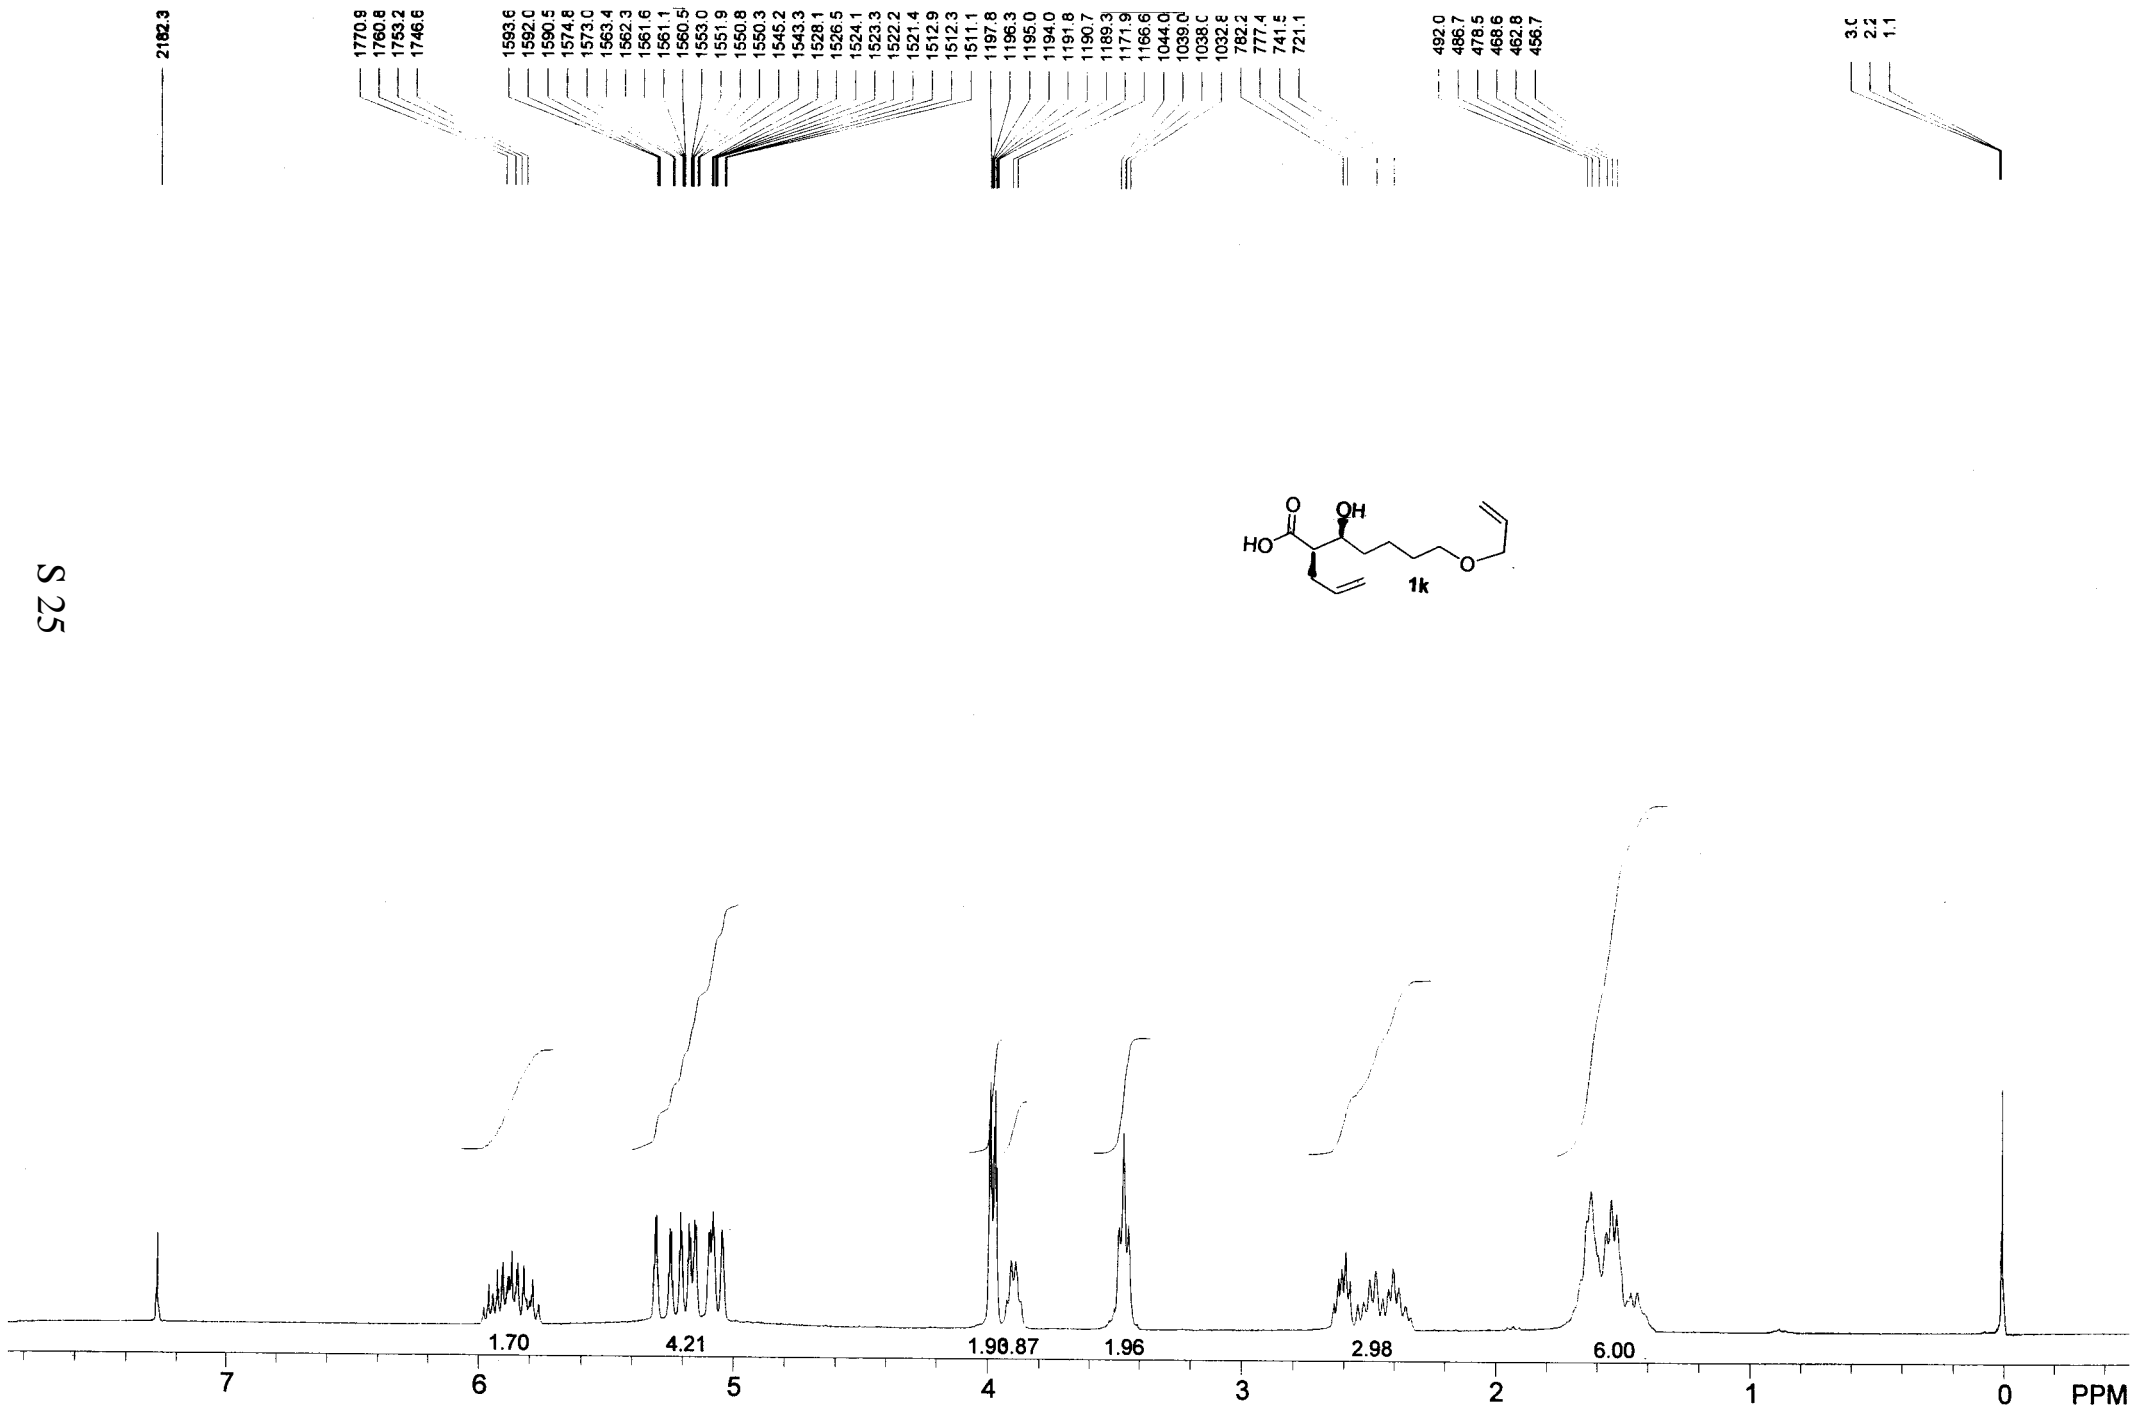

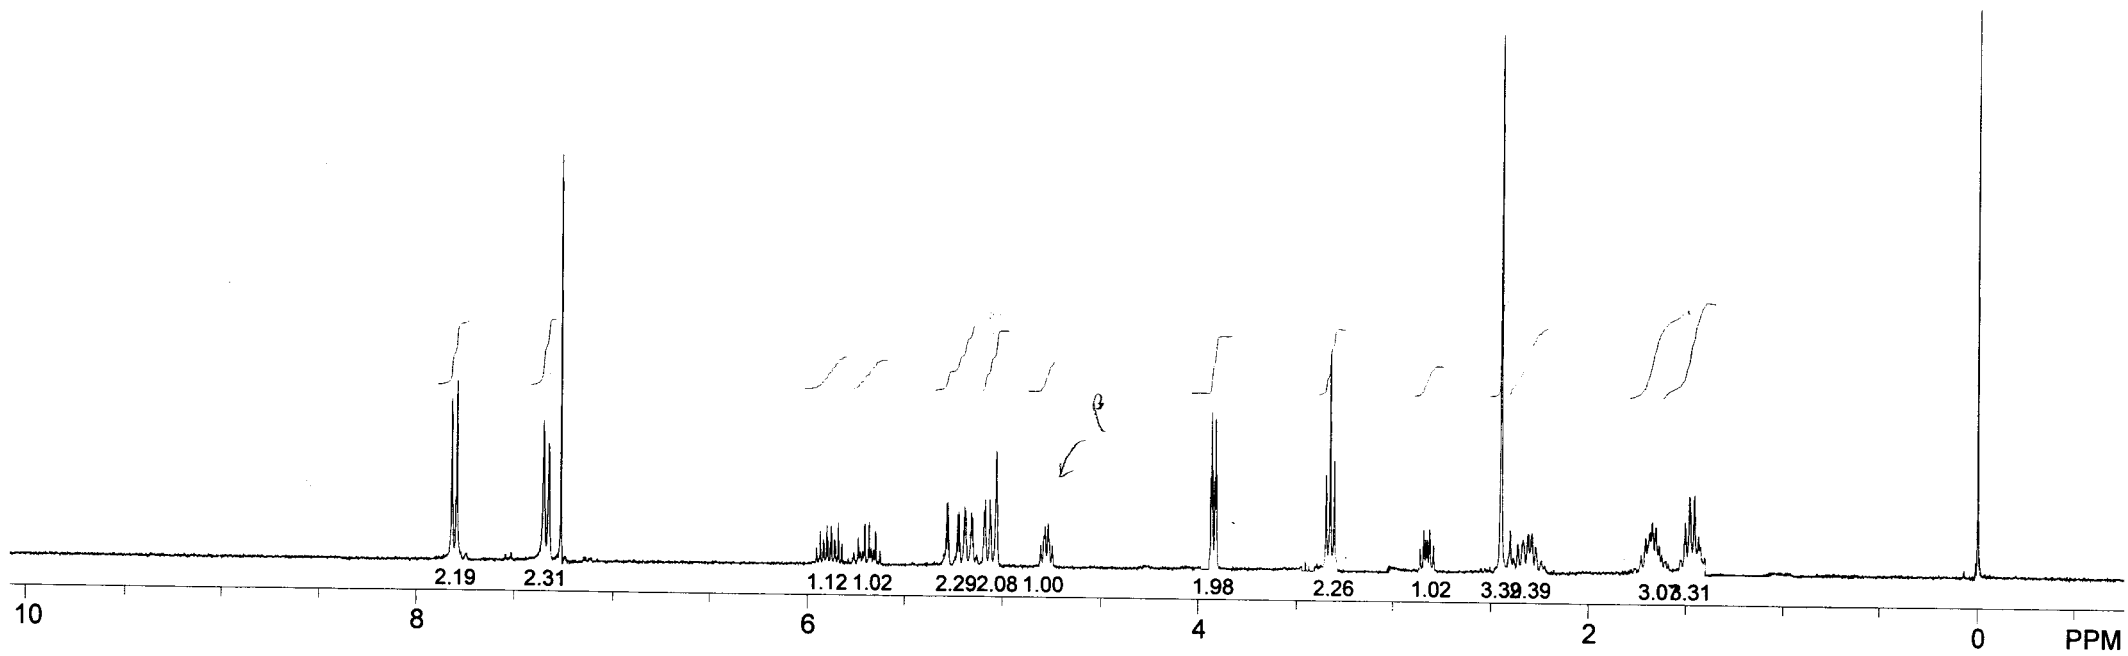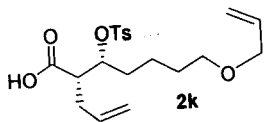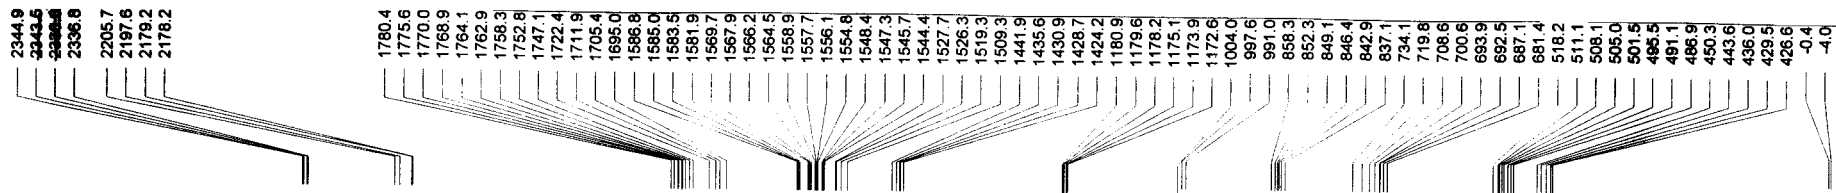

S 27

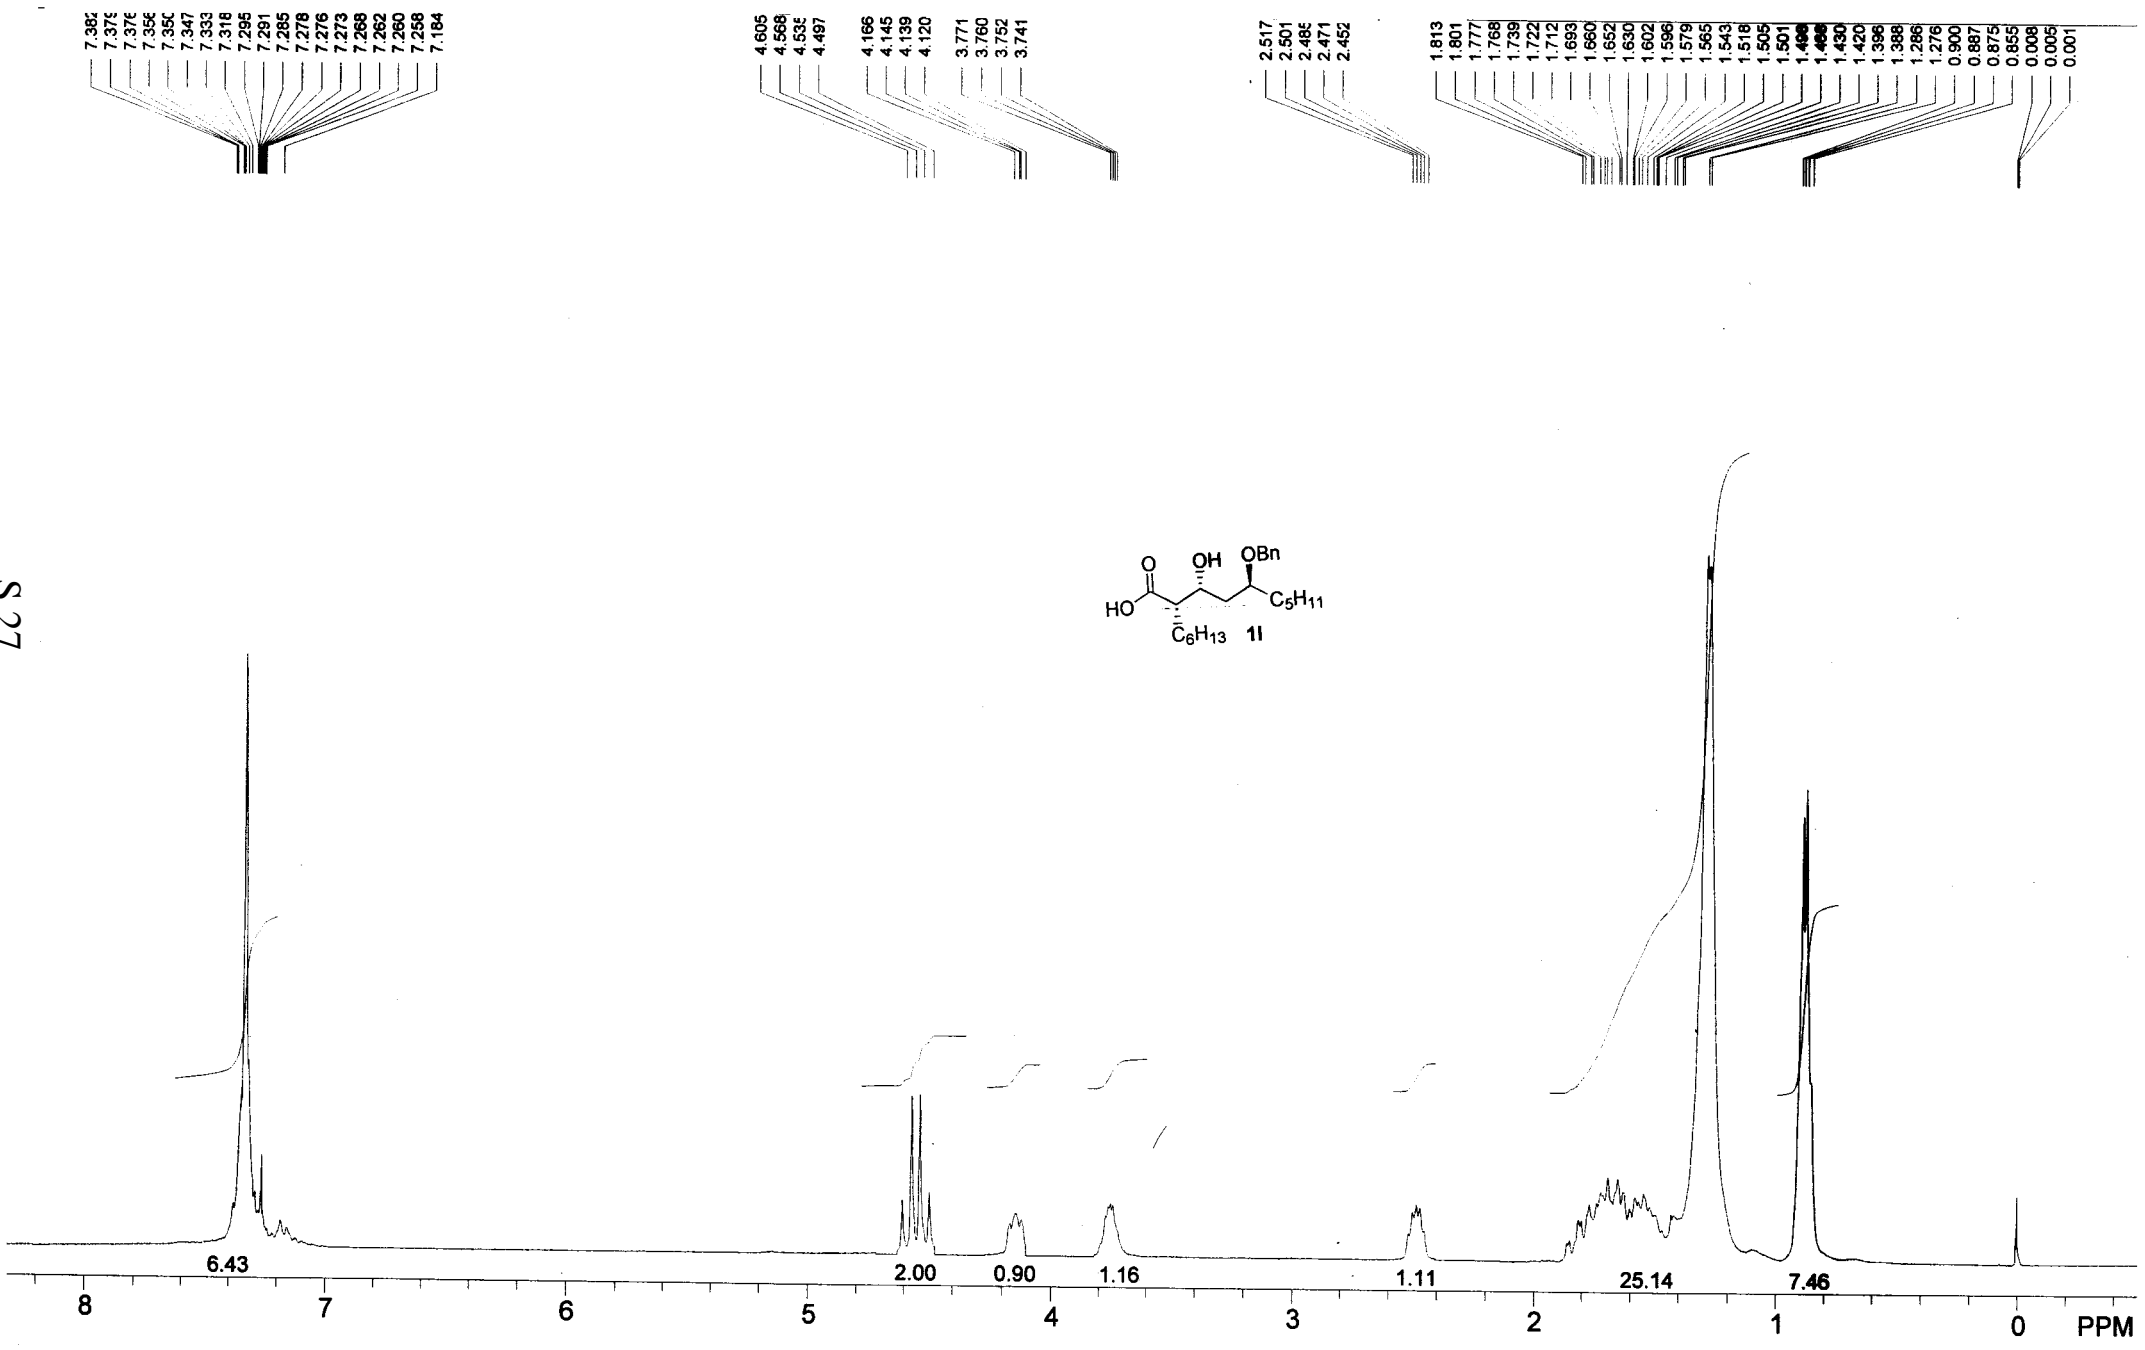

S 28

2342.5  
2340.6  
2338.8  
2334.0  
2332.3  
2330.3  
2208.4  
2203.9  
2200.3  
2197.2  
2195.0  
2193.3  
2188.6  
2184.8  
2180.4  
2179.0

1530.6  
1527.9  
1525.8  
1523.2  
1521.4  
1519.0  
1516.8  
1514.3  
1359.5  
1348.8  
1283.9  
1283.0

1047.8  
1044.9  
1041.0  
1038.0  
1035.5

837.5  
832.6  
828.0  
823.5  
818.3  
724.1  
718.7

569.6  
567.1  
560.7  
557.9  
556.3  
553.3  
545.9  
544.0  
476.6  
473.0  
467.3  
458.9  
448.3  
445.8  
443.5  
443.0  
441.0  
412.4  
408.1  
400.2  
398.6  
392.0  
388.9  
386.1  
376.8  
363.8  
355.6  
271.7  
268.5  
265.1  
257.2  
250.3  
0.3

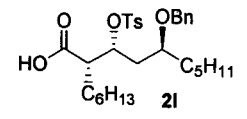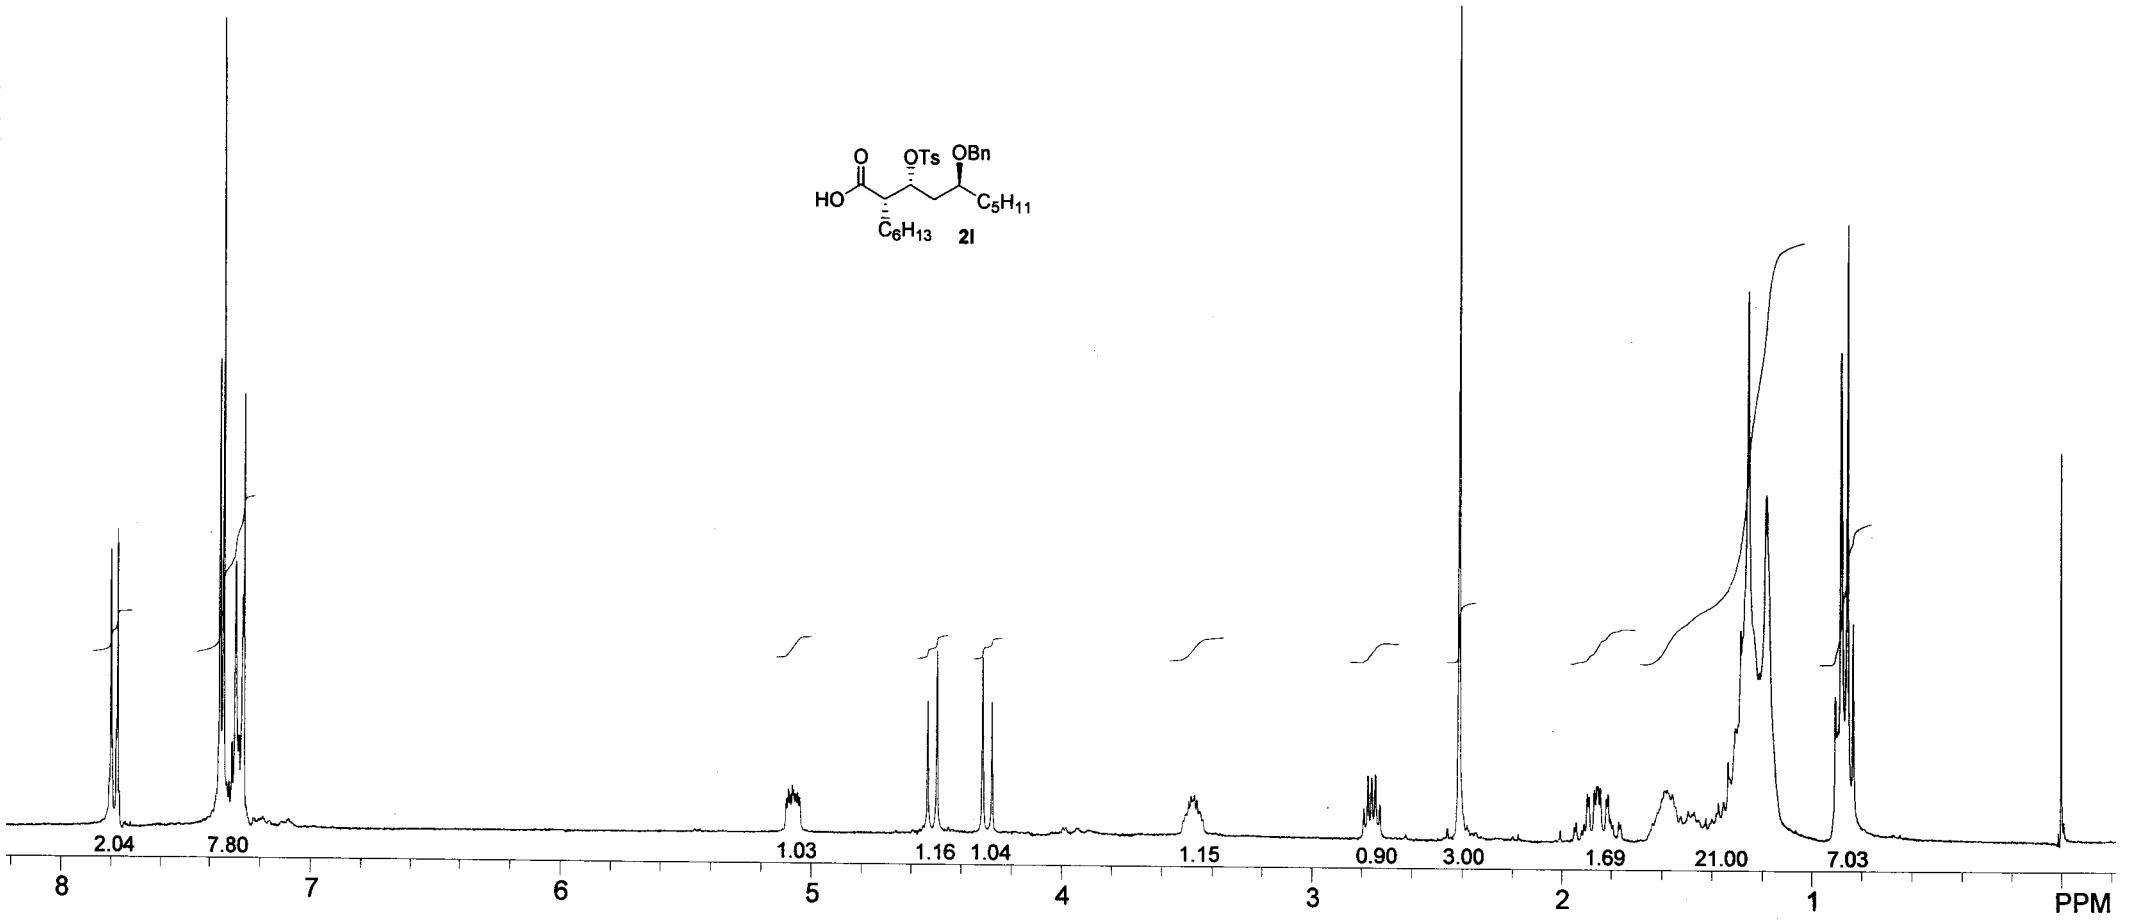

S 29

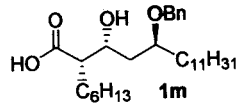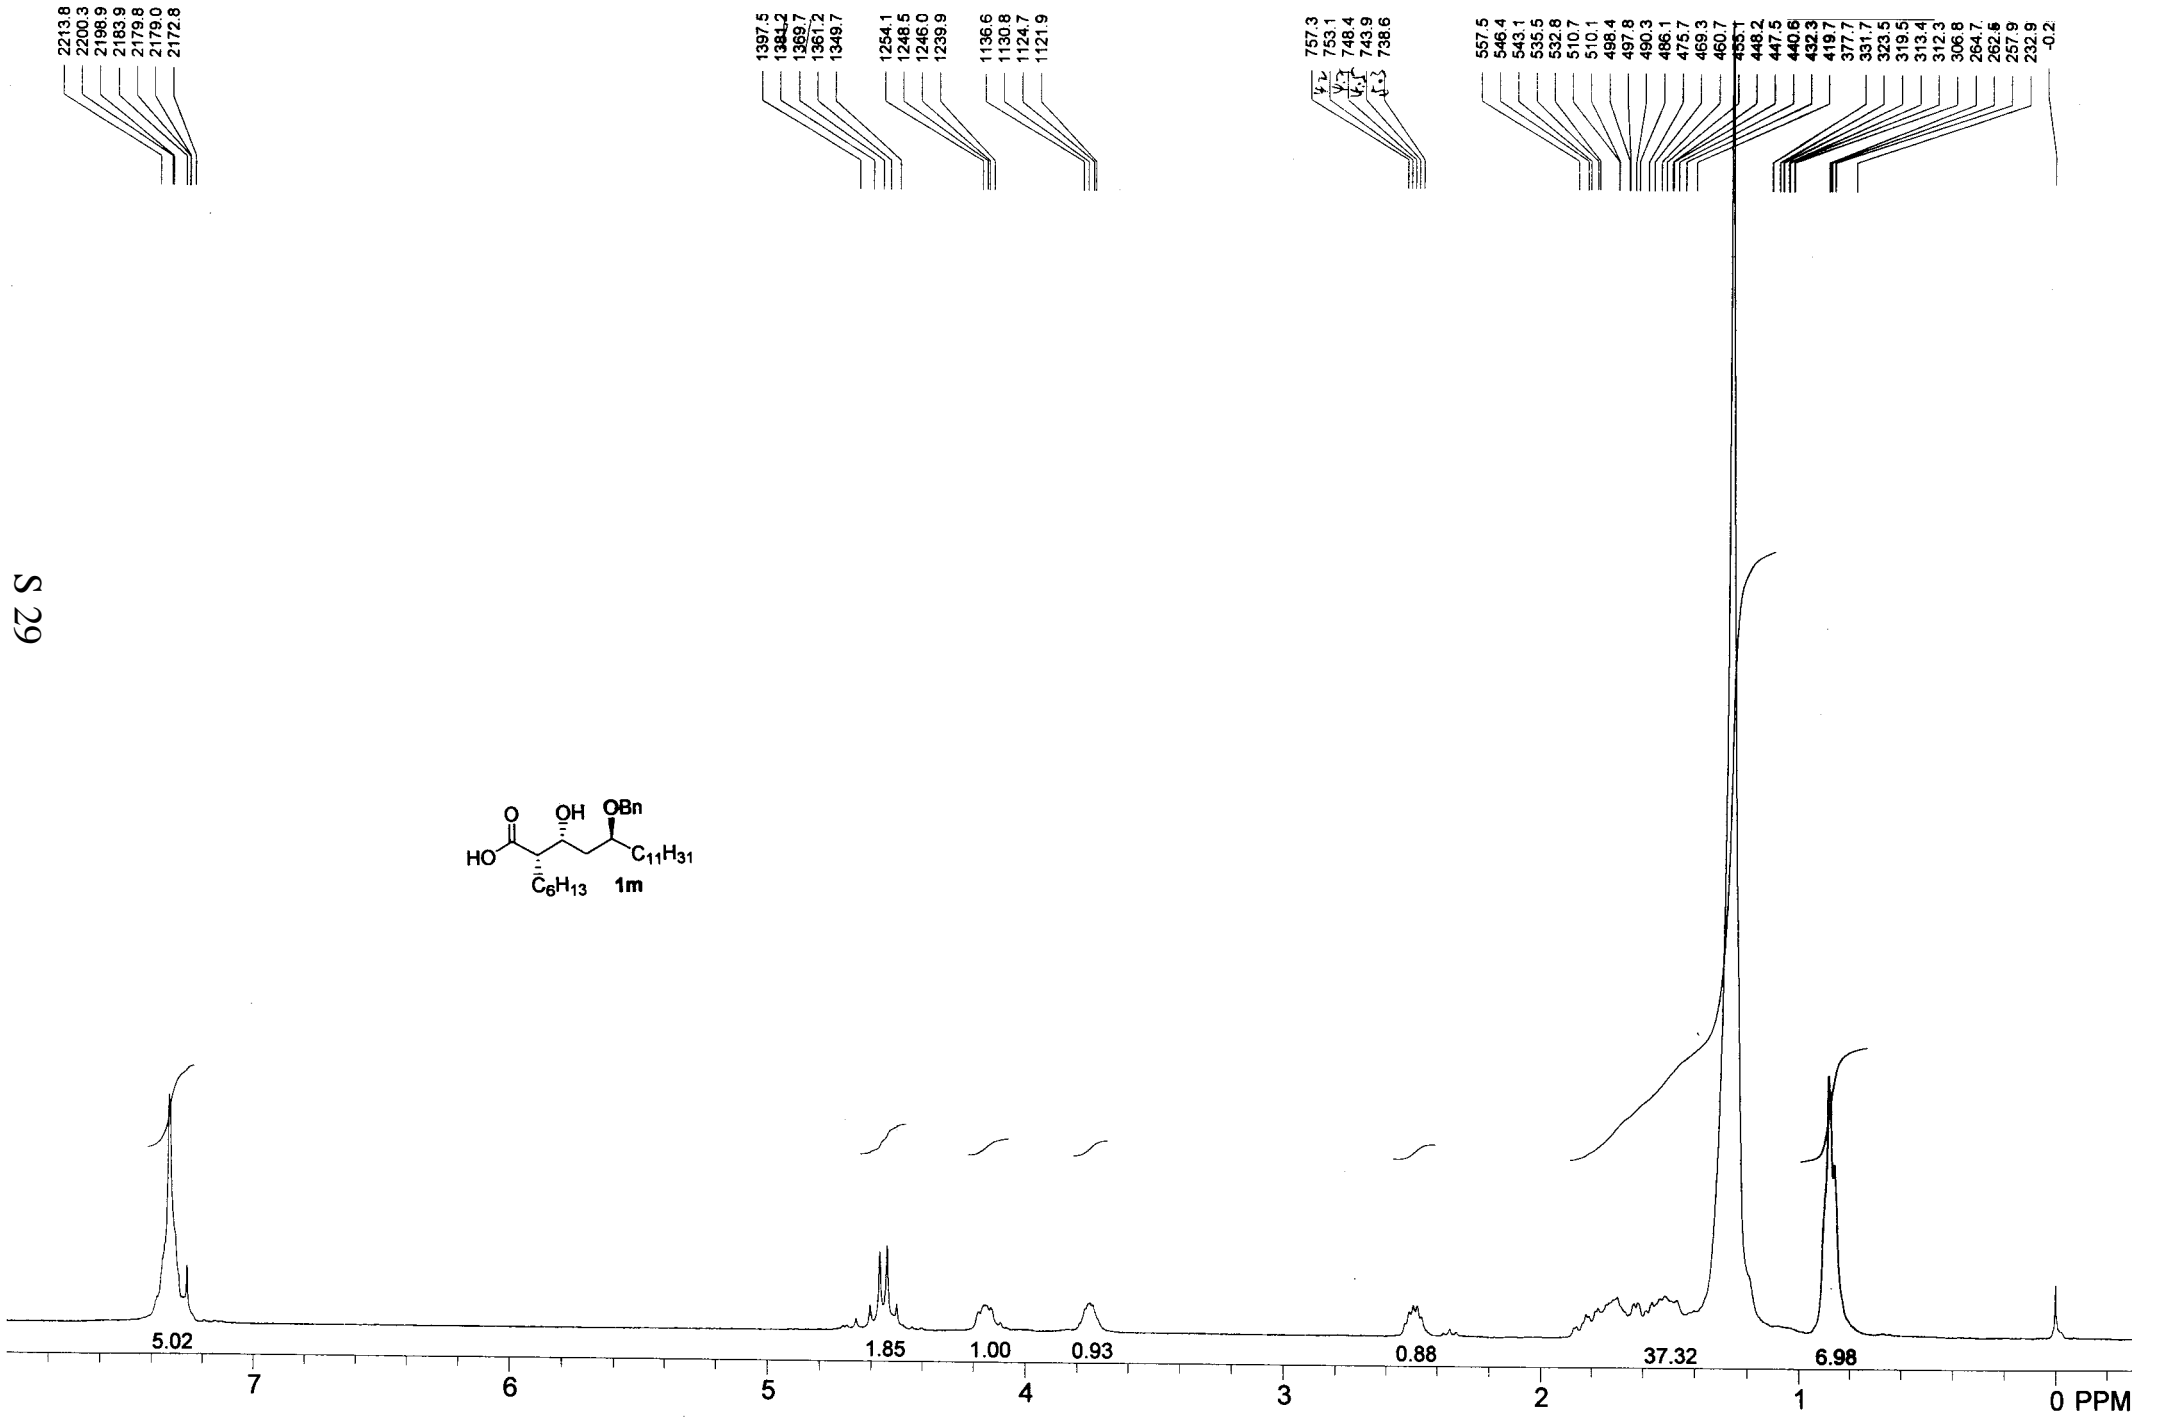

2213.8  
2200.3  
2196.9  
2183.9  
2179.8  
2179.0  
2172.8

1397.5  
1381.2  
1369.7  
1361.2  
1349.7  
1254.1  
1248.5  
1246.0  
1239.9  
1136.6  
1130.8  
1124.7  
1121.9

757.3  
753.1  
748.4  
743.9  
738.6

557.5  
546.4  
543.1  
535.5  
532.8  
510.7  
510.1  
496.4  
497.8  
490.3  
486.1  
475.7  
469.3  
460.7  
455.1  
448.2  
447.5  
440.6  
432.3  
419.7  
377.7  
331.7  
323.5  
319.5  
313.4  
312.3  
306.8  
284.7  
262.6  
257.9  
232.9  
-0.2

S 30

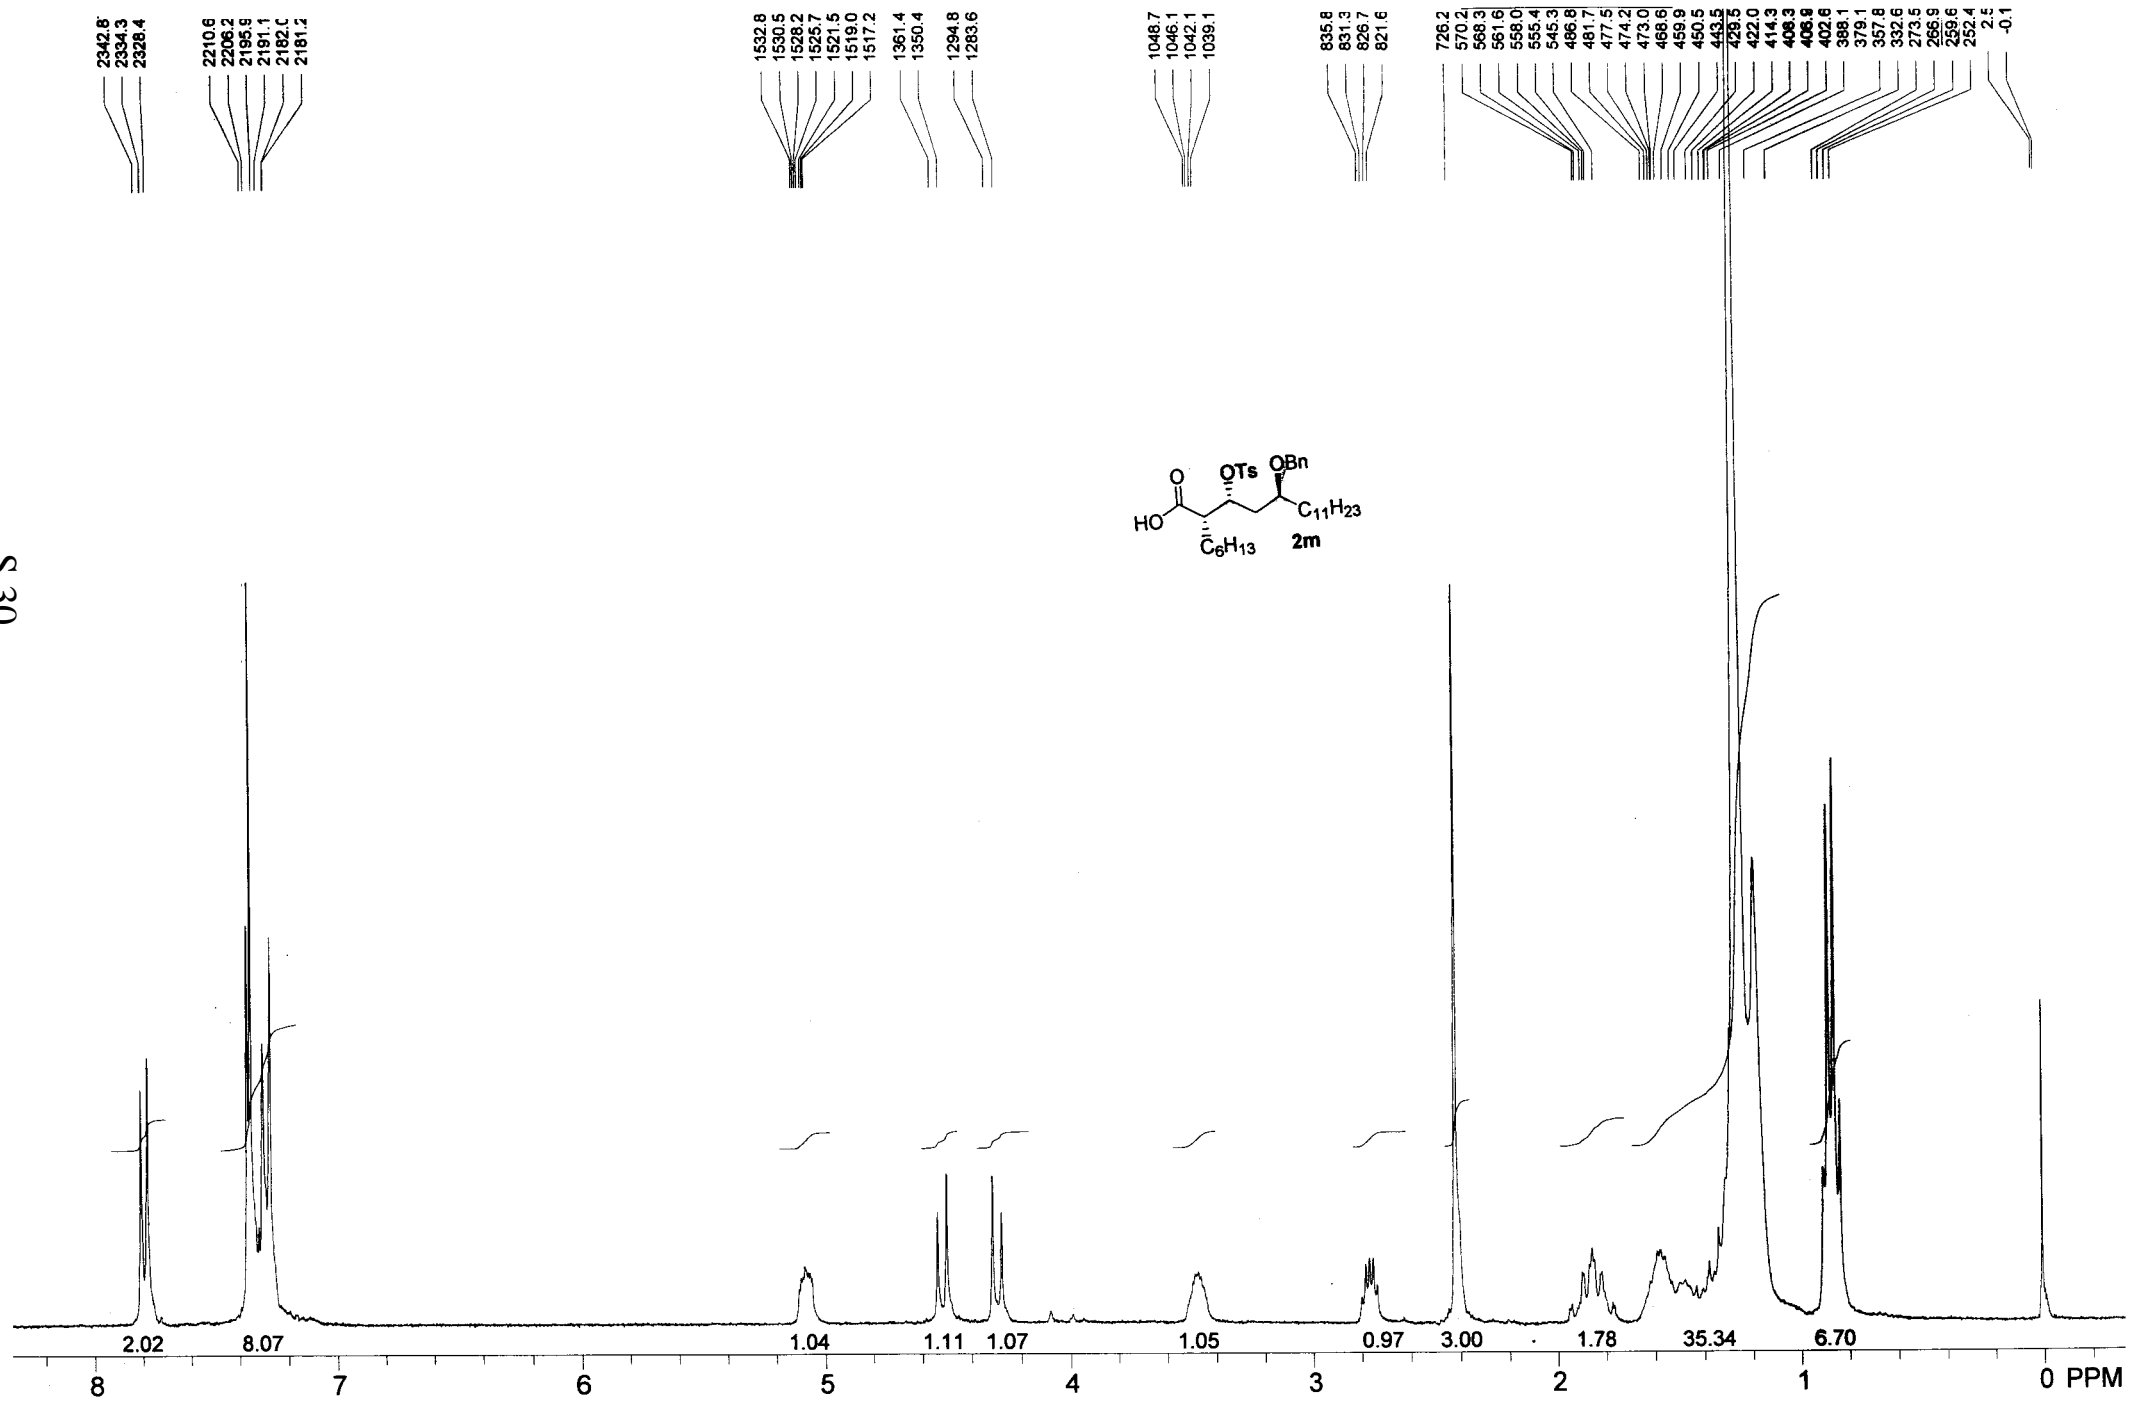

S 31

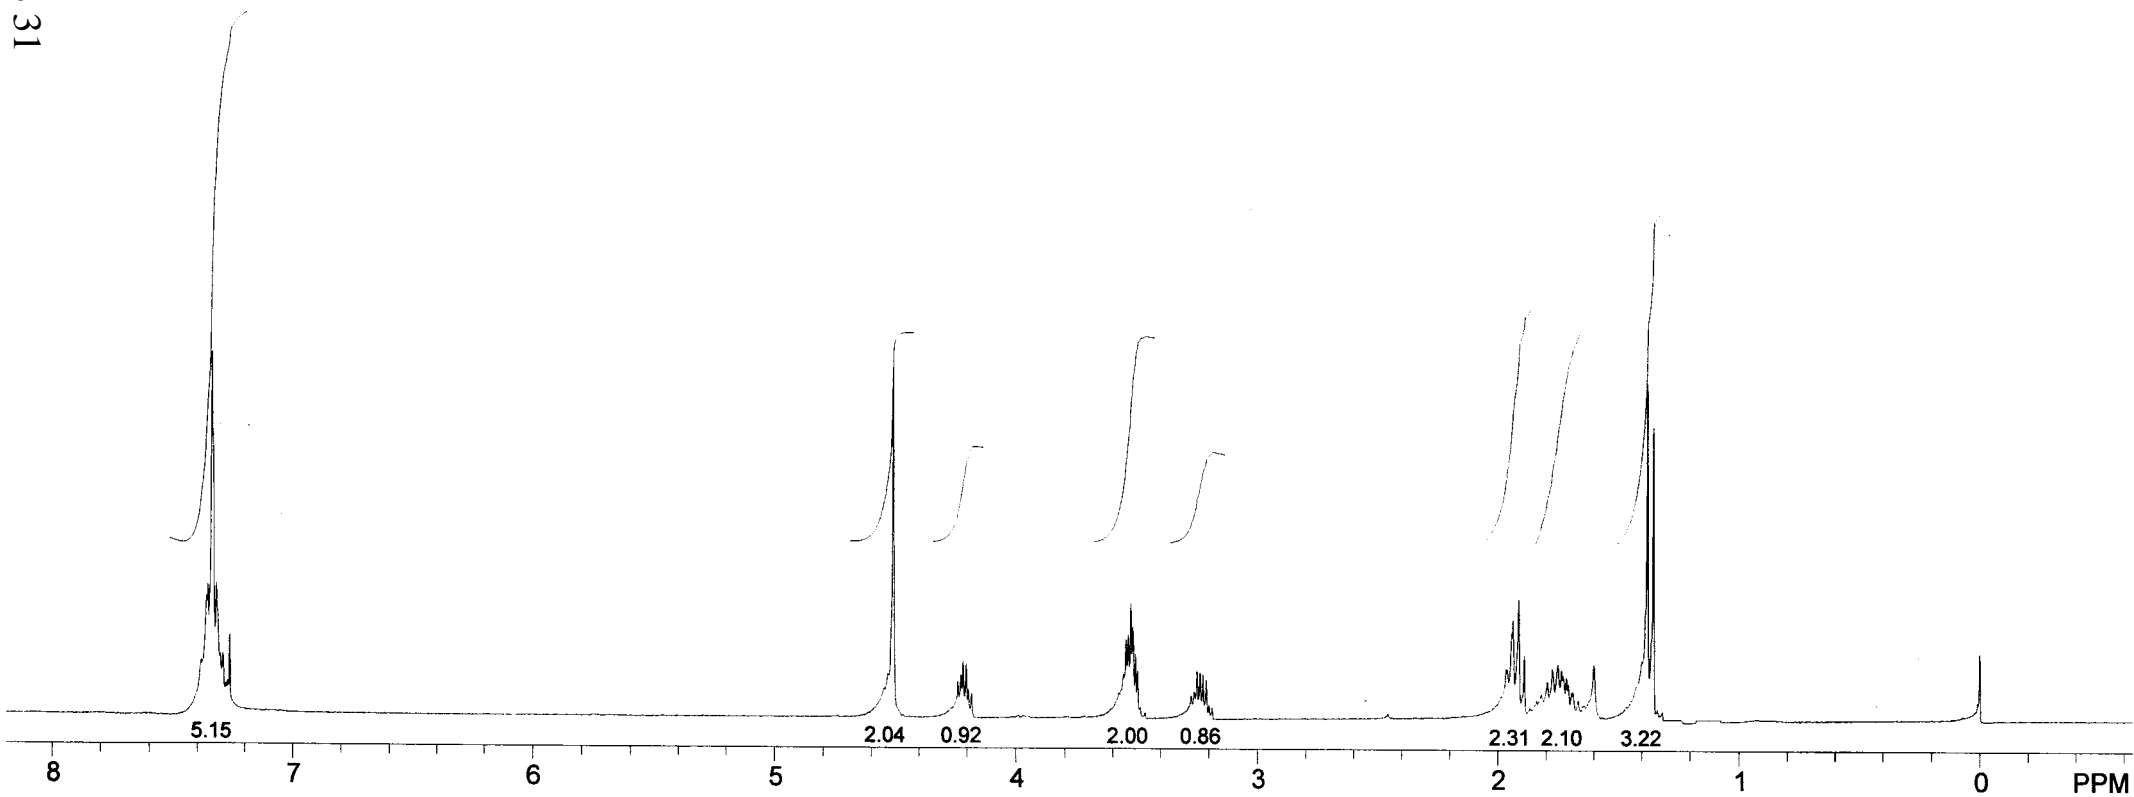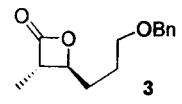

2215.3  
2208.6  
2207.3  
2201.8  
2200.2  
2196.3  
2191.6  
2187.9  
2184.3  
2182.0  
2179.5  
2178.7

1364.1  
1359.6  
1352.6  
1271.8  
1268.3  
1265.7  
1261.3  
1258.7  
1254.9

1072.5  
1066.9  
1063.8  
1061.1  
1057.7  
1054.9  
1051.6  
1049.0  
982.2  
977.9  
974.6  
970.8  
967.1  
963.2

589.5  
588.0  
582.4  
581.0  
573.6  
567.1  
551.6  
546.0  
538.6  
532.5  
525.1  
520.9  
518.9  
514.7  
512.0  
507.8  
506.0  
499.7  
479.5  
419.7  
412.8  
405.2

2.9  
0.2

S 32

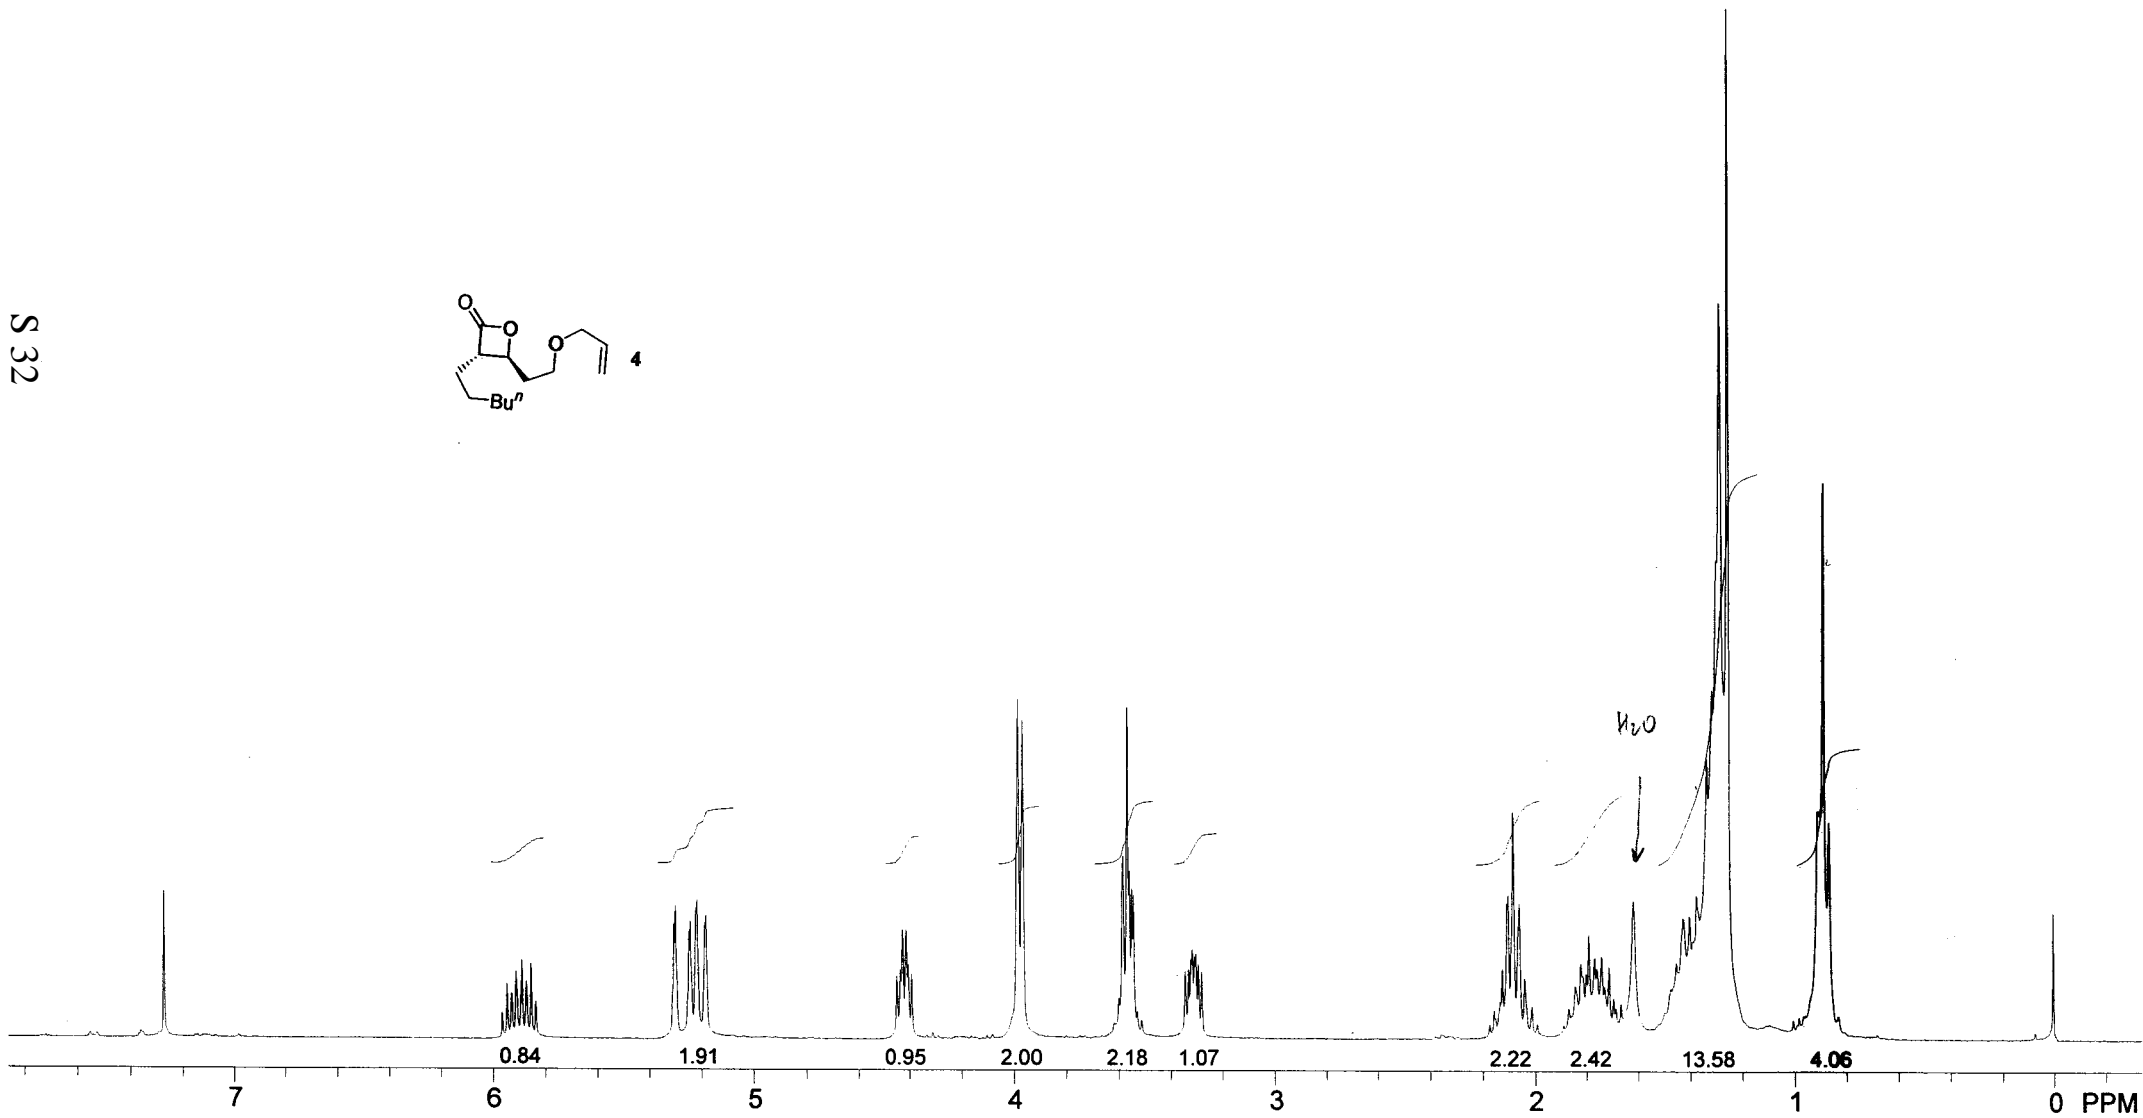



SS 33

2210.6  
2209.2  
2204.7  
2200.5  
2196.3  
2183.1  
2181.6  
2178.6

1350.8  
1346.6  
1333.4  
1328.7  
1324.7  
1320.7  
1316.6

1094.1  
1088.7  
1084.4  
1082.4  
1079.4  
1077.4  
1075.4  
1073.4  
1070.4  
1065.1  
998.1  
996.1  
994.4  
991.4  
990.1  
985.4

640.0  
635.1  
630.5  
626.0  
618.7  
527.0  
521.7  
516.0  
512.1  
506.4  
503.4  
497.4  
493.3  
488.1  
481.6  
478.7  
474.4  
472.4  
467.7  
287.9  
280.5  
278.2  
274.3  
271.2  
268.8  
265.0  
260.5

4.5  
3.2  
-0.0

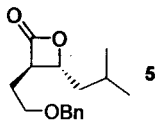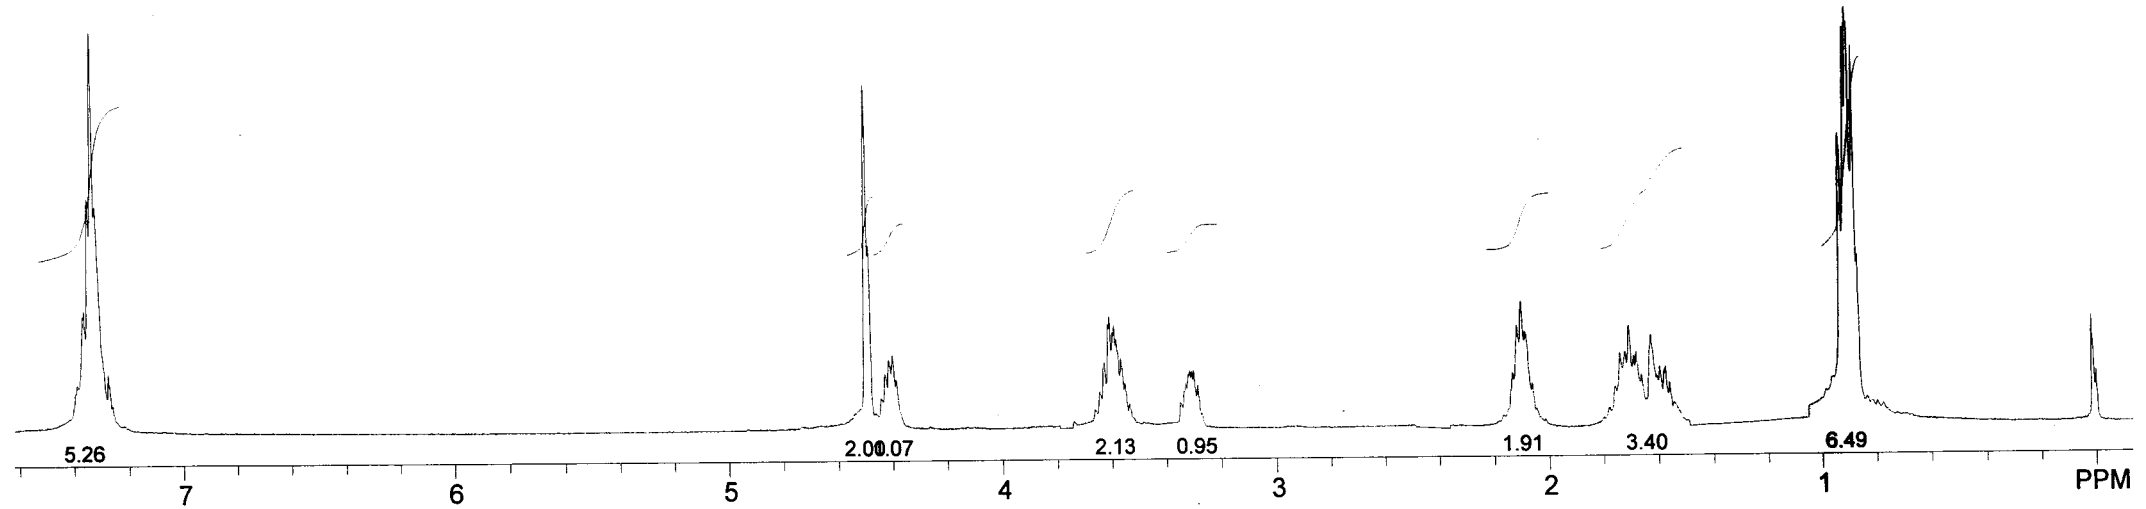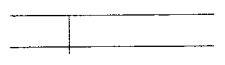

Supplement: b416383d.pdf [file b416383d.pdf]
